# 1 Dual specificity phosphatase 7 drives the formation of cardiac mesoderm 2 in mouse embryonic stem cells

3 Stanislava Sladeček<sup>1</sup>, Katarzyna Anna Radaszkiewicz<sup>1</sup>, Martina Bóhmová<sup>1</sup>, Tomáš Gybel<sup>1</sup>,  
4 Tomasz Witold Radaszkiewicz<sup>1</sup>, Jiří Pacherník<sup>1\*</sup>

5 \* Correspondence:

6 Jiří Pacherník

7 [jipa@sci.muni.cz](mailto:jipa@sci.muni.cz)

8 Affiliations:

9 <sup>1</sup>Department of Experimental Biology, Faculty of Science, Masaryk University, Brno, Czech Republic

10 Keywords: DUSP7<sup>1</sup>, MAKP<sup>2</sup>, cardiomyogenesis<sup>3</sup>, mouse embryonic stem cells<sup>4</sup>, mesoderm<sup>5</sup>.

## 11 Abstract

12 Dual specificity phosphatase 7 (DUSP7) is a protein belonging to a broad group of phosphatases that  
13 14 can dephosphorylate phosphoserine/phosphothreonine as well as phosphotyrosine residues within  
14 the 15 same substrate. DUSP7 has been linked to the negative regulation of mitogen activated protein  
15 kinases 16 (MAPK), and in particular to the regulation of extracellular signal-regulated kinases 1 and  
16 2 (ERK1/2). 17 MAPKs play an important role in embryonic development, where their duration,  
17 magnitude, and 18 spatiotemporal activity must be strictly controlled by other proteins, among others  
18 by DUSPs. In this 19 study, we focused on the effect of DUSP7 depletion on the in vitro differentiation  
19 of mouse embryonic 20 stem (ES) cells. We showed that even though DUSP7 knock-out ES cells do  
20 retain some of their basic 21 characteristics, when it comes to differentiation, they preferentially  
21 differentiate towards neural cells, 22 while the formation of early cardiac mesoderm is repressed.  
22 Therefore, our data indicate that DUSP7 23 is necessary for the correct formation of neuroectoderm  
23 and cardiac mesoderm during the in vitro 24 differentiation of ES cells.

## 24 Introduction

25 The mitogen activated protein kinase (MAPK) pathway is one of the better described and vigorously  
26 studied signaling pathways. MAPK plays an important role in many cellular processes like  
27 proliferation, differentiation or apoptosis, and its function has been described in the contexts of animal  
28 development, cancer biology, immune response, to name just a few [1–4]. The MAPK family includes  
29 three kinase subfamilies - extracellular signal-regulated kinases (ERK), c-Jun N-terminal kinases  
30 (JNK), and p38 [5]. MAPKs are active when phosphorylated on both threonine and tyrosine residues  
31 within their activation loop (TxY motif) and can be inactivated by a number of phosphatases, among  
32 which are dual specificity phosphatases (DUSP) [6,7].

33 The human genome encodes more than twenty members of the DUSP family, although their  
34 classification can sometimes differ in literature. DUSPs, similarly to MAPKs, have been studied in  
35 many types of cancer lines as well as in embryonic stem cells and animal development. They have  
36 been described as important for pluripotency [8–10], neural development [11], cardiac development  
37 [12], immunity [13], and cancer prognosis [14] etc.

38 Dual specificity phosphatase 7 (DUSP7) is a cytoplasmic phosphatase, which dephosphorylates  
39 extracellular signal-regulated kinases 1 and 2 (ERK1/2) [15]. The expression of DUSP7 is upregulated,  
40 either due to an increase in its expression or stability in some pathological conditions such as leukemia  
41 or breast cancer [16–20], where it is associated with poor prognosis. Although DUSP7 was studied in  
42 cancer cell lines and even sparked interest as a potential cancer drug target [21], it remains one of the  
43 less studied DUSPs.

44 In this study, we focused on the role of DUSP7 in mouse embryonic stem (ES) cells and its effect on  
45 cell differentiation in vitro. We observed that the depletion of DUSP7 did not change some of the basic  
46 characteristics of mouse embryonic stem cells. However, DUSP7 deficiency did lead to changes in cell  
47 differentiation through the formation of embryoid bodies. Specifically, differentiating DUSP7 KO cells  
48 expressed lower levels of markers typical for mesoderm and, later on, cardiomyocytes, and higher  
49 levels of markers typical for ectoderm and, later on, neural progenitors. Together, these data indicate  
50 that DUSP7 plays an important role in early neural and cardiac mesoderm development.

## 51 **Material and methods**

### 52 *Cell culture and differentiation*

53 The mouse ES cell line R1 was adapted to feeder-free culture. R1 ES and all genetically modified cell  
54 lines derived from them were cultivated as described previously [22]. Undifferentiated cells were  
55 cultivated in DMEM media supplemented with 15% FBS, 100 U/ml penicillin, 0.1 mg/ml  
56 streptomycin, and 1x non-essential amino acid (all from Gibco-Invitrogen) and 0.05 mM  $\beta$ -  
57 mercaptoethanol (Sigma), supplemented with 1 000 U/ml of leukemia inhibitory factor (LIF,  
58 Chemicon). Differentiation of the cells was induced by seeding them onto a non-adhesive surface in  
59 bacteriological dishes to form floating embryoid bodies or by seeding them in the form of hanging  
60 drops (400 cells per 0.03 ml drop), all in medium without LIF. After five days of the cultivation of  
61 embryoid bodies, they were transferred to adherent tissue culture dishes and cultivated in DMEM-F12  
62 (1:1) supplemented with insulin, transferrin, selenium (ITS, Gibco-Invitrogene), and antibiotics (as  
63 above), referred to as ITS medium. Cells were cultivated for up to 21 days depending on individual  
64 experiments and the medium was changed every two days. In the case of experiments with genetically  
65 selected cardiomyocytes, on day 14 medium was supplemented with 0.5mg/ml of antibiotic G418. An  
66 ES cell line for genetically selected cardiomyocytes was prepared subsequently: R1\_MHC-neor/pGK-  
67 hygro ES cells (referred to as HG8 cells), carrying the Myh6 promoter regulating the expression of  
68 neomycin phosphotransferase, were prepared by the transfection of R1 cells by MHC- neor/pGK-hygro  
69 plasmid (kindly provided by Dr. Loren J. Field, Krannert Institute of Cardiology, Indianapolis, US)  
70 [23].

### 71 *Creating KO lines using CRISPR-Cas9*

72 DUSP7-null mouse embryonic cell lines were prepared using the CRISPR-Cas9 system as previously  
73 described [24,25]. Guide RNA was designed using the online CHOPCHOP tool [26]. Plasmid  
74 pSpCas9(BB)-2A-Puro (PX459) V2.0 (#62988, Addgene) with puromycin resistance was used as the  
75 target plasmid to carry the guide RNA. Plasmids were prepared as described previously [27]. For  
76 transfection, 24h after passaging, cells were transfected in a serum-free medium using  
77 polyethyleneimine (PEI) in a stoichiometry of 6  $\mu$ l of PEI per 1  $\mu$ g of DNA for 8h. Then, the medium  
78 was changed for medium with puromycin (Invivogen, 10ug/ml). Selection lasted for 24h, after which  
79 the medium was changed for fresh medium without puromycin, and when formed, colonies of  
80 potentially KO cells were picked. Acquired KO cell lines were tested by PCR using the primers

81 TGGTGTGTGAGTCCTGACCG and AGAGGTAGGGCAGGATCTGG (337bp product) for the  
82 amplification of genomic DNA, and Hpy166II restriction enzyme (R0616S, New England BioLabs)  
83 (240bp and 97bp products), then verified by next generation sequencing using the Illumina platform,  
84 as described previously [28].

#### 85 *Cell growth*

86 Cells were seeded at a concentration of 1000 cells/cm<sup>2</sup> and cultivated in full medium for up to 5 days.  
87 From day 3, cells were stained with crystal violet, as previously described [29]. After the colonies had  
88 dried, 10% acetic acid was added to the wells and incubated with shaking for 30min. The absorbance  
89 of the obtained solution was then measured at 550nm on a Sunrise Tecan spectrophotometer.

90 For proliferation analysis using the WST-8 assay, cells were seeded on a culture-treated flat bottom  
91 96-well plate at concentrations of 1000, 500, 250, 125 and 67 cells/well and cultivated in full medium  
92 for 3 days. Cells were incubated with WST-8/Methoxy-PMS (MedChem Expres HY-D0831 and HY-  
93 D0937, final concentration 0,25mg/ml and 2,5ug/ml respectively) for 5 hours and absorbance was  
94 measured at 650 nm and 450 nm on Multiscan GO (Thermo Scientific).

95 For proliferation analysis using the EdU assay, cells were seeded at a concentration of 5000cells/cm<sup>2</sup>  
96 and cultivated in full medium for 3 days. Cell proliferation was measured using the Click-iT™ Plus  
97 EdU Alexa Fluor™ 488 Flow Cytometry Assay Kit (Thermo Fisher, C10632). Cells were treated with  
98 10 μM EdU (5-ethynyl-2'-deoxyuridine) for one hour prior to harvesting and processed according to  
99 the kit manufacturer's instructions. The untreated cells of each analyzed line were used as a control.  
100 Cells were analyzed using Cytex® Northern Lights spectrum flow cytometry. 20,000 events were  
101 acquired per each sample the percentage of EdU positive cells was analyzed using SpectroFlo software  
102 (Cytex). Single cells were identified and gated by pulse-code processing of the area and the width of  
103 the signal. Cell debris was excluded by using the forward scatter threshold.

#### 104 *Analysis of gene expression by qRT-PCR*

105 Total RNA was extracted by RNeasy Mini Kit (Qiagen). Complementary DNA was synthesized  
106 according to the manufacturer's instructions for RevertAid Reverse Transcriptase (200 U/μL)  
107 (EP0442, Thermo Fisher). qRT-PCR was performed in a Roche Light-cycler using the protocols for  
108 SyberGreen (Roche) or TaqMan (Roche). The protocol for primers using SyberGreen was as follows:  
109 an initial activation step at 95°C for 5 min, followed by 40 cycles at 95°C for 10 s, an annealing  
110 temperature (Table 1) for 10 s, and a temperature of 72°C for 10 s, followed by melting curve  
111 genotyping and cooling. The protocol for primers using TaqMan was as follows: an initial activation  
112 step at 95 °C for 10 min followed by 45 cycles of 95 °C for 10 s, 60 °C for 30 s, and 72 °C for 1 s with  
113 data acquisition. Primer sequences, annealing temperatures, and the probes used are listed in Table 1.  
114 The gene expression of each sample was expressed in terms of the threshold cycle normalized to the  
115 average of at least two so-called house-keeping genes. These were *Actb* and *Tbp* in the case of the  
116 SybrGreen protocol, and *Rpl13a* and *Hprt* in the case of the TaqMan protocol.

117 **Table 1.** Probes and sequences of primers and temperature used in quantitative RT-PCR.

| Gene of interest | Forward primer 5' → 3' | Reverse primer 5' → 3' | UPL probe no | Ta (°C) |
|------------------|------------------------|------------------------|--------------|---------|
| <i>Hprt</i>      | tcctcctcagaccgctttt    | cctggtcatcatcgctaac    | #95          | 60      |
| <i>Rpl13a</i>    | catgaggtcgggtggaagta   | gcctgtttccgtaacctcaa   | #25          | 60      |
| <i>Nkx2.5</i>    | gacgtagcctggtgtctcg    | gtgtggaatccgtcgaaagt   | #53          | 60      |

|              |                        |                        |     |    |
|--------------|------------------------|------------------------|-----|----|
| <i>Myh6</i>  | cgcatcaaggagctcacc     | cctgcagccgcattaagt     | #6  | 60 |
| <i>Myh7</i>  | cgcatcaaggagctcacc     | ctgcagccgcagtagggt     | #6  | 60 |
| <i>Mef2c</i> | acccaatcttctgccact     | gatctccgccatcagac      | #6  | 60 |
| <i>Gata4</i> | ggaagacacccaatctcg     | catggccccacaattgac     | #13 | 60 |
| <i>T</i>     | actggtctagcctcggagtg   | ttgctcacagaccagagactg  | #27 | 60 |
| <i>Mesp1</i> | acccatcgttctgtacgc     | gcatgtcgtgtgaagag      | #89 | 60 |
| <i>Sox1</i>  | ccagctccagagcccgact    | ggcatcgcctcgtgggtt     |     | 61 |
| <i>Actb</i>  | gatcaagatcattgctcctct  | taaacgcagctcagtaacag   |     | 60 |
| <i>Tbp</i>   | accgtgaatcttggtgtaaac  | gcagcaaatcgcttgggatta  |     | 60 |
| <i>Oct4</i>  | agaggatcaccttgggtaca   | cgaagcgacagatggtggtc   |     | 61 |
| <i>Nanog</i> | aggacaggttcagaagcaga   | ccattgctagtctcaaccactg |     | 60 |
| <i>Zfp42</i> | gcacacagaagaaagcagga   | cactgatccgcaaacacct    |     | 59 |
| <i>Fgf5</i>  | aagtagcgcgacgtttcttc   | ctggaaactgctatgttccgag |     | 61 |
| <i>Klf4</i>  | gactaaccttggcgtgag     | gggttagcaggttcgaaagg   |     | 60 |
| <i>Dusp7</i> | gcccacccgctccatcattccc | cagccgtcgtctcgcagcttc  |     | 62 |
| <i>Pax6</i>  | cgggaaagacttagcagccaa  | gtgaaggaggagacaggtgtg  |     | 62 |
| <i>Afp</i>   | tggttacacgaggaaagccc   | aatgtcggccattccctcac   |     | 60 |
| <i>Gata1</i> | gaagcgaatgattgtcagca   | cagcagaggccaggaaaag    |     | 61 |
| <i>Gata2</i> | gggagtgtgcaactgtggt    | gcctgttaacattgtgcagc   |     | 61 |
| <i>Mash1</i> | ttctccggtctcgtcctactc  | ccagttggtaaagtccagcag  |     | 62 |
| <i>Tubb3</i> | tgaggcctcctcacaagta    | gtcgggcctgaataggtgtc   |     | 62 |
| <i>Dusp6</i> | acctggaaggtggcttcagt   | tccgtgcactattggggtc    |     | 62 |

118

## 119 *Counting of cardiomyocytes*

120 The relative number of cardiomyocytes in differentiating ES cell cultures was determined. For these  
 121 experiments, cells that were initially differentiated in the form of hanging drops were used. After 5  
 122 days of differentiation, embryoid bodies were transferred to ITS medium in 24-well plates and  
 123 cultivated for a total of 20 days. Before analyses, cells were washed with phosphate buffered saline  
 124 (PBS), incubated in a 0.3% solution of Collagenase II (Gibco) in DMEM media without serum for 20  
 125 minutes, and then incubated in trypsin (0.25% in PBS-EDTA, Gibco) for 5 minutes. Trypsin was  
 126 inactivated by adding DMEM media with FBS, and cells in this medium were transferred to a new 24-  
 127 well plate and cultivated for a further 24h. Cells were then washed with PBS, fixed for 20min with 4%  
 128 formaldehyde, permeabilized by 0.1% TWEEN 20 solution in PBS, and stained using anti-  
 129 cardiomyocyte heavy myosin antibody (anti-MHC, clone MF20, kindly provided by Dr. Donald  
 130 Fischman, Developmental Studies Hybridoma Bank, Iowa City, IA, USA). They were then visualized  
 131 using anti-mouse IgG conjugate Alexa568 (Invitrogen). Nuclei were counterstained with DAPI (1  
 132 mg/l). Images were acquired using an Olympus IX-51 inverted fluorescence microscope (Olympus) or  
 133 Leica TCS SP8 (Leica) confocal microscope. In each repetition at least five images were taken from at  
 134 least two wells for each line and the ratio between red and blue signals was analyzed using ImageJ  
 135 software. The analysis of whole embryoid body staining was performed on cells cultivated in the same  
 136 manner, but cells were seeded on day 5 on cover slips and on day 20 cells were not disassociated, but  
 137 the whole embryoid body was fixed and stained as described above. Representative images were  
 138 acquired using Leica TCS SP8 (Leica) confocal microscope.

139 The relative number of cardiomyocytes was also determined using R1\_MHC-neor/pGK-hygro ES cells  
140 (HG8 cells) and their DUSP7 KO clones (MHC-neo/DUSP7 KO; analysis of frame shift mutations in  
141 both DUSP7 alleles in these cell lines by NGS shown Fig. 1B), as described previously [22]. Estimation  
142 of the relative number of viable cells after antibiotic selection was performed by ATP quantification in  
143 whole cell lysates. Cells were lysed in Somatic cell ATP releasing reagent for ATP determination  
144 (FLSAR-1VL, Sigma-Aldrich). Each cell lysate was mixed with Cellular ATP Kit HTS (155-050,  
145 BioThema) in the ratio of 1:1 and luminescence was analyzed using Microlite™ 1+ strips (Thermo  
146 Scientific) and Chameleon V (Hindex).

#### 147 *Small Interfering RNA (siRNA) Transfection*

148 Cells were transfected by commercially available siRNA DUSP6 (sc-39001) and DUSP7 (sc-61428)  
149 to knock down gene expression, or by related non-silencing control (all Santa Cruz Biotechnology,  
150 USA) using Lipofectamine RNAiMAX Reagents (Thermo Fisher Scientific Inc., USA) according to  
151 the manufacturer's instructions. Cells were harvested 24h after transfection and the expressions of  
152 selected proteins and posttranslational modification were analyzed by western blot [30].

#### 153 *Western-blot analysis*

154 Cells were directly lysed in Laemmli buffer (100 mM Tris/HCl (pH 6.8), 20% glycerol, 1% SDS,  
155 0.01% bromophenol blue, and 1% 2-mercaptoethanol). Western blotting was performed according to  
156 the manufacturer's instructions with minor modifications (SDS-PAGE run at 110 V, transfer onto  
157 PVDF membrane for 1 h at 110 V (BIO-RAD)). Membranes were blocked in 5% non-fat dry milk  
158 solution in TBS-T for 30 min and subsequently incubated overnight at 4 °C with primary antibodies  
159 listed in Table 2. Next, membranes were washed in TBS-T and incubated with HRP-conjugated  
160 secondary antibodies (Sigma-Aldrich). Immunoreactive bands were detected using ECL detection  
161 reagent kit (Merck-Millipore) and the FusionSL chemiluminescence documentation system (Vilber-  
162 Lourmat). Results were quantified by the densitometric analysis of Western blot bands using the Fiji  
163 distribution of ImageJ.

164 **Table 2.** Primary antibodies used for western-blot analysis.

| Antibody     | Catalog number       | Company                              |
|--------------|----------------------|--------------------------------------|
| p-ERK1/2     | CS-4370S             | Cell Signaling                       |
| ERK1/2       | CS-4695S             | Cell Signaling                       |
| PARP         | 9532                 | Cell Signaling                       |
| JNK          | sc-571               | Santa Cruz Biotechnology             |
| pJNK         | sc-6254              | Santa Cruz Biotechnology             |
| p-38         | 9212                 | Cell Signaling                       |
| pp-38        | 9211                 | Cell Signaling                       |
| MHC          | anti-MHC, clone MF20 | Developmental Studies Hybridoma Bank |
| βIII tubulin | Ab7751               | Abcam                                |
| DUSP6        | sc-377070            | Santa Cruz Biotechnology             |
| DUSP6        | 3058                 | Cell Signaling                       |
| Vinculin     | V9264                | Sigma                                |
| β-Actin      | sc-47778             | Santa Cruz Biotechnology             |

165

166



## 167 *Isolation of mouse hearts*

168 CD1 mice were maintained and bred under standard conditions and were used in accordance with  
169 European Community Guidelines on accepted principles for the use of experimental animals. Mouse  
170 hearts were isolated according to an experimental protocol that was approved by the National and  
171 Institutional Ethics Committee (protocol MSMT-18110/2017-5). Individual heart samples were  
172 prepared as described previously [22].

## 173 *Statistical analysis*

174 Data analysis was performed by GraphPad Prism. Data are expressed as mean  $\pm$  standard deviation  
175 (SD). Statistical analysis was assessed by t-test and by one- or two-way ANOVA, and by Bonferroni's  
176 Multiple Comparison post hoc test. Values of  $P < 0.05$  were considered to be statistically significant  
177 (\*  $p < 0.05$ ).

## 178 **Results**

### 179 *Absence of DUSP7 does not affect the phenotype of ES cells*

180 In order to determine the effect of DUSP7 on ES cells, we created DUSP7 knock out (KO) cell lines  
181 using the CRISPR-Cas9 system, as previously described [27,31] (see experimental design on Fig. 1A  
182 and 1B). These mutated cell lines were verified by NGS (Fig. 1C) and were then used for all subsequent  
183 experiments (see experimental set up in Fig. 1D). All used DUSP7 KO cell lines had either the same  
184 or different mutations in individual alleles, but in both cases the result was a frame shift mutation (Fig.  
185 1C).

186 We were able to cultivate all obtained DUSP7 KO cell lines in vitro for a substantial time (40+  
187 passages), during which we did not observe any morphological difference between KO and wild type  
188 (WT) control (CTR) cell lines. To determine whether DUSP7 KO cell lines proliferate at a similar rate  
189 we stained them on three consecutive days using crystal violet, the results indicating that there were  
190 no significant differences in growth rate between WT and KO cell lines, nor between individual KO  
191 lines (Fig. 2A). The same proliferation was confirmed by the EdU assay and the WST-8 assay (Fig. 2B  
192 and 2C).

193 Next, we determined whether DUSP7 KO cells retain their stem cell phenotype by testing whether they  
194 differ from WT cells in expressing markers which are known to change if pluripotency is compromised  
195 – specifically, *Oct4*, *Nanog*, *Klf4*, *Zfp42* and *Fgf5* [32–36]. Cells were kept in standard culture  
196 conditions for ES cells for 5-40 passages before these markers were analyzed. We did not observe any  
197 statistical differences in the expressions of the given markers between any of these lines (Fig. 2D). On  
198 the basis of the above, we conclude that the depletion of DUSP7 does not affect the proliferation rate  
199 of ES cells nor their pluripotent phenotype.

### 200 *DUSP7 regulates germ layer specification in differentiating ES cells*

201 To further test their stem cell-like properties, we studied the ability of DUSP7 KO cells to differentiate.  
202 All cell lines were able to form embryoid bodies (EBs) of the same shape and size in hanging drops or  
203 in cell suspension culture (Fig. 3A). In 5-day-old EBs, transcripts of all three germ layers were  
204 determined – namely, *Sox1* and *Pax6* as markers for ectoderm/ neuroectoderm; *T*, *Mesp1*, *Mef2c*,  
205 *Gata4*, *Gata1* and *Gata2* as markers for mesoderm; and *Afp* as a marker for entoderm [37–42]. In  
206 DUSP7 KO cells, the expressions of *T*, *Mesp1* and *Gata4* were decreased compared to WT cells, while

207 the expressions of *Sox1* and *Pax6* were increased. Excluding the expression of *Afp* in one DUSP7 KO  
208 cell line, we did not observe significant differences in the levels of *Mef2c*, *Gata1*, *Gata2*, or *Afp*  
209 between KO and WT cells. The increase in *Afp* was observed in only one of the DUSP7 KO cell lines,  
210 indicating that it might be an artefact typical only for this individual line (Fig. 3B). These data show  
211 that DUSP7 is required for the correct formation of ectoderm and mesoderm during in vitro  
212 differentiation of ES cells.

### 213 *DUSP7 is required for cardiomyocyte formation*

214 Since we observed differences in the abilities of cells to form mesoderm and ectoderm at early stages,  
215 we differentiated cells in vitro for a further 5-10 days and then studied the formation of cardiac and  
216 neural cells. DUSP7 KO cells exhibited lower levels of expression of cardiomyocyte-specific  
217 transcripts (*Nkx2.5*, *Myh6*, *Myh7*) and higher levels of the expression of neuro-specific markers (*Tubb3*  
218 and *Mash1*) (Fig.4A). Similar difference in cardiomyogenesis and neurogenesis were observed also at  
219 the protein level, where DUSP7 KO cells exhibited lower levels of cardiomyocyte-specific (MHC) and  
220 higher levels of neuro-specific ( $\beta$ III tubulin) proteins compared to WT (Fig. 4B). To further explain the  
221 observed decreases in the expressions of cardiomyocyte specific transcripts and proteins, we studied  
222 the number of formed cardiomyocytes. Cells were cultivated for the first five days as hanging drops in  
223 order to form single EBs. Then, each EB was individually cultivated for a total of 20 days and either  
224 the whole embryoid body was stained for cardiomyocyte-specific (MHC) or neuro-specific  
225 ( $\beta$ III tubulin) markers (Supplementary fig. 1-2) or cells were re-seeded onto a fresh plate as single cells.  
226 In the latter case, after a further day of cultivation, they were stained with antibody specific for cardiac  
227 myosin heavy chains (MHC) and with DAPI. The ratio between the number of nucleuses and myosin  
228 positive cells, which determines the number of cardiomyocytes, was lower in DUSP7 KO cell lines  
229 compared to wild type cells (Fig. 5A and 5B, Supplementary fig. 3.). In addition, we determined the  
230 relative number of formed cardiomyocytes on day 20 after cardiomyocytes specific selection on HG8  
231 cells and their DUSP7 KO cells (see Material and methods). Here, we again observed that DUSP7 KO  
232 cells formed a lower number of cardiomyocytes compared to WT cells (Fig. 5C). These results  
233 therefore indicate that DUSP7 is required for the formation of mouse cardiomyocytes in vitro.

### 234 *DUSP7 depletion does not change the phosphorylation of ERK*

235 Since DUSP7 is known to dephosphorylate MAPK with a preference towards ERK1/2, we tested  
236 whether there were differences between the levels of phosphorylated ERK, JNK and p38 at the basal  
237 level in ES cells. However, only ERK1/2 showed any differences and these were very small and  
238 deemed to be statistically insignificant (Fig. 6A). Interestingly, when using siRNA for DUSP7, we  
239 also observed no change in the phosphorylation of ERK after 24h, but when using siRNA for DUSP6,  
240 we saw a stronger signal for pERK1/2. (Fig 5.B). Since the phosphorylation and dephosphorylation of  
241 ERK is an important process for signal transduction and very dynamic process, we tested whether there  
242 would be a change in the kinetics of phosphorylation between wild type and KO cells. Cells were  
243 starved for 6h in media without serum. After this time, serum was added to a final concentration of  
244 30% and phosphorylation was measured by western blot method 10min, 30min, 1h and 3h after  
245 stimulation. The highest phosphorylation was observed 10min after stimulation in all cell lines and  
246 after 1h the level of phosphorylation had returned to its basal level. Although there were slight  
247 differences between individual sets in this dynamic, neither the overall maximum level of ERK  
248 phosphorylation nor the speed of dephosphorylation between wild type and KO cell lines showed  
249 statistically significant differences (Fig. 6C).

250

## 251 *Level of DUSP7 increases during differentiation*

252 Since the depletion of DUSP7 did not have an effect on the basic characteristics of ES cells, (Fig. 2,  
253 Fig. 6), but did have an effect on the differentiation of cells in later stages of in vitro cultivation and on  
254 the differentiation of cardiomyocytes, we measured changes in the expression of *Dusp7* using RT-  
255 qPCR in cells from in vitro culture (Fig. 7A) and in hearts of mice from different stages of development  
256 (Fig. 7B). We found that the level of *Dusp7* increased over time during differentiation in culture as  
257 well as in the hearts of mice during their ontogenesis. Therefore, since DUSP7 might have a more  
258 important role in later stages of differentiation in vitro than in ES cells, we tested the level of  
259 phosphorylation of ERK1/2 in 5-day-old embryoid bodies but were not able to see any significant  
260 difference between the tested cell lines (Fig. 7C).

## 261 **Discussion**

262 It is generally agreed that DUSPs specifically dephosphorylate MAPKs. However, when it comes to  
263 their specificity to individual proteins there are some conflicting reports about which substrates they  
264 can dephosphorylate, especially when it comes to the more studied phosphatases such as DUSP1 [43–  
265 47], these conflicts appearing to arise because these proteins are studied in different conditions or in  
266 different models. DUSP7 is generally believed to dephosphorylate ERK1/2, but in some conditions  
267 was shown to interact with JNK [48–52] However, there are also studies which suggest the possibilities  
268 of DUSP7 dephosphorylating substrates other than members of the MAPK family. It has been shown  
269 that DUSP7 can also dephosphorylate cPKC isoforms [53], thus inhibiting their activity. In the case of  
270 DUSP7 depletion, the activity of cPKC is not inhibited at the correct time or for the correct duration,  
271 which leads to defects in meiosis in mouse oocytes; however, our data suggest that the depletion of  
272 DUSP7 does not affect the mitosis of ES cells (Fig 2B).

273 There are numerous studies which show the effects of the activation of MAPK/ERK in ES cells on  
274 their stemness and differentiation [54–56]. The depletion of DUSP2 and its effect on ES cells was also  
275 studied in association with DUSP7 by Chappell et al., who showed that DUSP7 is necessary for the  
276 preservation of pluripotency [57]. However, a significant effect on pluripotency was shown only when  
277 DUSP7 was overexpressed, or when DUSP7 was knocked-down together with DUSP2. In contrast,  
278 our model shows that ES cells are able to adapt to long cultivation when DUSP7 is knocked-out by  
279 itself (Fig. 2D).

280 During differentiation in KO cells, we observed a significant decrease in the general mesodermal  
281 marker *T* as well as in *Mesp1*, which appears in the cardiogenic area of the primitive [58]. The  
282 expression of *Gata4*, a gene necessary for normal heart tube formation [40,59] and a regulator of other  
283 genes critical for cardiomyogenesis [60], was also downregulated, unlike its cofactor *Mef2c*, which is  
284 also expressed during the early development of myocardium and other muscle cells [39,61,62]. The  
285 *Mef2c* marker was more variable between KO lines, but did not show a significant decrease or increase  
286 compared to control. Although this gene is widely used as a cardiac marker, it is greatly expressed also  
287 in mouse brain [63] and is crucial for normal neural development [64]; therefore, its potentially lower  
288 levels due to reduced cardio myogenesis are masked by potentially higher levels in developing neural  
289 progenitors. Preferential differentiation of DUSP7 KO into neuro-ectodermal lineages is supported by  
290 elevated levels of *Sox1* and *Pax6*. In contrast to cardiac-mesoderm markers, the levels of mesodermal  
291 markers *Gata1* and *Gata2*, which are important for the formation of hematopoietic lineages, were not  
292 changed by the depletion of DUSP7. The importance of different MAPK in hematopoiesis and  
293 especially in diseases such as leukemia has been studied, but it has been shown that p38 $\alpha$  plays the key  
294 role in hematopoietic stem cell activation and, later, in their maturation during hematopoiesis [65].



295 With respect to the interaction of DUSP7 with members of the MAPK family, there is least evidence  
296 that DUSP7 interacts with p38; therefore, the fact of its depletion having no effect on hematopoietic  
297 markers was to be expected.

298 Several members of the DUSP family have been studied with respect to the development of heart tissue  
299 or the neural system, most of them via the mechanism linked with the dephosphorylation of ERK.  
300 When it comes to neural development, DUSP1, DUSP4 and DUSP6 were shown to be regulated by  
301 nerve growth factor [11,66,67]. DUSP1 is necessary for normal axonal branching [68], similarly to  
302 DUSP6, which also plays a role in normal axon development [69]. The overexpression of DUSP1 has  
303 a neuroprotective effect in response to ischemia [70,71] and, together with DUSP4, they protect motor  
304 axons from degradation [72]. The role of DUSP7 in neural development has not yet been thoroughly  
305 studied, despite DUSP7 being expressed in whole brain of mice [73]. Our study, therefore, is one of  
306 the first to show that DUSP7 can inhibit the development of neuronal lineages in an in vitro model of  
307 EC cell differentiation.

308 When it comes to the development of heart, MAPK play an important role since they are highly  
309 involved in FGF and BMP signaling – two very important signaling pathways playing a role in cardiac  
310 mesoderm and myocardium formation. These pathways need to be almost periodically activated and  
311 inhibited for normal formation of heart, which can be achieved by negative feedback mediated by  
312 MAPK-induced DUSP expression [2,74].

313 In heart, DUSPs have mostly been linked with the regulation of the ERK signaling pathway and the  
314 proliferation of cardiomyocytes. In general, all studies involving the depletion of any DUSPs show  
315 heart enlargement. However, in some cases, there need to be special conditions like heart exposure to  
316 hypoxia for hypertrophy to be apparent [75], or hypertrophy is detectable only in adults or after  
317 injury, such as in DUSP6-deficient fish [76]. Depletions of different DUSPs in mice have shown  
318 changes in cardiomyocyte morphology (DUSP8, [77]), or have been linked to protection (DUSP6,  
319 [78]) or, in contrast, to increased susceptibility to cardiomyopathy (DUSP1, DUSP4, [79]). All of these  
320 studies either operate with the measurement of hearts of adult subjects or, in the case of in vitro studies,  
321 they use already differentiated or neonatal cardiomyocytes, in contrast to our study, which investigated  
322 differentiation from ES cells and the effect of DUSP7 on early cardiomyocyte differentiation.

323 As mentioned before, an appropriate level of activation at the right time and for the right duration plays  
324 an important role in the development of heart. For example, the activation of ERK by 12-O-  
325 Tetradecanoylphorbol-13-acetate (TPA) leads to an increase in cardiomyogenesis, but only when the  
326 treatment is applied in a certain time window [22]. Similarly, we see in our experiments that applying  
327 TPA at the indicated time does increase the number of cardiomyocytes in our KO cell lines  
328 (Supplementary fig. 4) comparably to wild types; however, already at this point, there are fewer  
329 mesodermal cells on which it can have an impact, as we showed by measuring T and Mesp1 expression.  
330 Furthermore, cardiomyocytes derived from KO cells have the same maturation profile as WT, as shown  
331 by the ratios of *Nkx2.5*, *Myh6*, and *Myh7* [22] (Supplementary fig. 5). Therefore, it seems that DUSP7  
332 plays a role in early stages of this process and does not have a big impact on later cardiomyocyte  
333 development.

334 Since, as mentioned, DUSP7 is specific towards MAPK with a preference towards ERK1/2 [15], we  
335 studied the levels of phosphorylation of different MAPK, but, we did not observe any significant  
336 differences in our KO cell lines compared to wild type. This is in contrast to previously published  
337 observations; however, some of these publications show only the slightly higher phosphorylation of  
338 ERK1/2 when the expression of DUSP7 is lowered in combination with other DUSPs [57] or under

339 special conditions, such as in DUSP7 KO mice that are on a high fat diet [80]. The observation of only  
340 a very small effect of DUSP7 could also be due to the fact that DUSP7 exhibited very low expression  
341 in our ES cells to begin with, more than 10x lower compared, for example, to DUSP6 (Supplementary  
342 fig. 6), which is reinforced by the fact that when using siRNA for DUSP6 and DUSP7 we could see  
343 changes in the phosphorylation of ERK only in the former case (Figure 5B). However, unlike in many  
344 studies which used siRNA or shRNA, or measured the phosphorylation levels a short time after adding  
345 some inhibitors or activators, our cells were modified using CRISPR/Cas9 and were cultivated for a  
346 long time, during which they might have adapted to DUSP depletion. This can be also demonstrated  
347 by DUSP6, where we did not see the same effect when it was knocked out using CRISPR/Cas9 as  
348 when using siRNA (Supplementary fig. 7). We also saw that the level of DUSP7 rises during  
349 differentiation in vitro and in developing heart, indicating its importance in such development,  
350 including the growth of myocardium. Since in our experimental design cells were being differentiated  
351 through the formation of EBs, and culture conditions throughout the differentiation process did not  
352 favor any individual cell type in particular, we can assume that the ones which achieved a head start  
353 overgrew in the culture and “smothered” other cell types, whose differentiation might have been  
354 compromised by genetic modification and which would have appeared later in the culture.

## 355 Conclusions

356 In summary, on the basis of all of our results, we can conclude that DUSP7 promotes early  
357 differentiation towards neural cells and that in DUSP7 KO early cardiac mesoderm is repressed, which,  
358 in prolonged cultivation, is reflected by a lower number of formed cardiomyocytes.

## 359 Figure legends

360 **Figure 1.** (A) Schematic representation of the guide RNA (gRNA) and *Dusp7* targeted area by the  
361 CRISPR-Cas9 system. (B) Schematic representation how the mouse embryonic KO cell lines were  
362 created and screened. (C) The guide RNA (gRNA) design and the sequences of verified deletions in  
363 the DUSP7 KO ES cell line edited by the CRISPR-Cas9 system are shown. (D) Schematic  
364 representation of the different experiments conducted in this study – at what time points different  
365 methods were employed and which markers were analyzed

366  
367 **Figure 2.** DUSP7 KO mouse embryonic stem cells retain the basic characteristic of the cell line. (A)  
368 To assess the growth curve of wild type and DUSP7 KO cell lines, 1000 cells/cm<sup>2</sup> were seeded on a  
369 fresh plate on day 0 and plates were stained with crystal violet staining on days 3,4 and 5 to assess their  
370 growth curve. The experiment was repeated three times and the value for individual experiments  
371 represents the average value obtained from four plates. (B) To assess proliferation rate, wild type and  
372 DUSP7 KO cell lines were seeded at a concentration 5000 cells/cm<sup>2</sup> and after 3 days of cultivation  
373 they were treated with EdU for 1h. Graph represents mean ± SD of four independent replicates. (C) To  
374 test whether the proliferation rate of DUSP7 KO cells will be different compared to wild type cells,  
375 based on cell density, cells were seeded in a 96 well plate at a concentration of 1000, 500, 250, 125  
376 and 67 cells/well. Cells were cultivated for 3 days after which they were incubated with WST-  
377 8/Methoxy-PMS for 5 hours and relative absorbance was measured. Graph represents mean ± SD of  
378 three independent replicates. (D) To check whether the DUSP7 KO cell lines retained their  
379 pluripotency, known markers of pluripotency *Oct4*, *Nanog*, *Zfp42*, *Ffg5* and *Klf4* were measured. Stem  
380 cells from low (around 5), mid-range (around 15) and high (40+) passages were used. Graphs  
381 represent mean ± SD of three independent replicates. Differences between groups were considered to  
382 be statistically significant when values of P < 0.05 (\*).

383

384 **Figure 3.** DUSP7 KO cell lines are able to differentiate into all three germ layers, but preferentially  
385 express markers for ectoderm over those for mesoderm. **(A)** Measures of diameter of embryoid bodies.  
386 400 cells were used to create embryoid bodies using the hanging drop method. The sizes of embryoid  
387 bodies were measured on Day 5. Graph represents mean  $\pm$  SD of seven independent replicates, each of  
388 the values representing the average value of at least 5 different measurements. **(B)** KO cell lines exhibit  
389 lower expressions of markers typical for mesoderm or cardiacmesoderm (*T*, *Mesp1*, *Gata4*) and higher  
390 expressions of markers for ectoderm (*Sox1*, *Pax6*), while markers that characterize both myogenesis  
391 and neurogenesis (*Mef2c*) as well as endoderm markers (*Afp*) and markers for hematopoietic mesoderm  
392 (*Gata1*, *Gata2*,) have similar expression profiles as in wild type cells. Markers were measured after 5  
393 days of differentiation. Graphs represent mean  $\pm$  SD of at least three independent replicates.  
394 Differences between groups were considered to be statistically significant when values of  $P < 0.05$  (\*).  
395

396 **Figure 4.** DUSP7 KOs after longer differentiation in vitro express lower levels of cardiac markers  
397 compared to wild type cells. **(A)** Analysis of cardiac and neural markers on qPCR. ES cells were  
398 cultivated for 10 days (*Mash1*) or 14 days (*Nkx2.5*, *Myh6*, *Myh7*, *BIIIIt*) and analyzed on RT-qPCR,  
399 normalized to the mean expression of *Hprt* and *Rpl* (TaqMan) or *Actb* and *Tbp* (SyberGreen). Graphs  
400 represent mean  $\pm$  SD of at least four independent replicates. **(B)** Western blot analysis of cardiac  
401 (MHC) and neural (BIIIItubulin) markers and their quantification (on the right) after 20 days of cell  
402 differentiation. Graphs represent mean  $\pm$  SD of four independent replicates. Differences between  
403 groups were considered to be statistically significant when values of  $P < 0.05$  (\*).  
404

405 **Figure 5.** DUSP7 KO cells produce a lower number of cardiomyocytes **(A)** DUSP7 KO cells form  
406 fewer cardiomyocytes compared to wild type cells, as analyzed by immunocytochemistry. Cells were  
407 stained after a total of 21 days of differentiation. Nucleus is shown in blue (DAPI) and cardiomyocytes  
408 in red, stained by cardiac specific antibody MHC. **(B)** Quantification of number of cardiomyocytes.  
409 Graph represents mean  $\pm$  SD of three independent replicates, each value representing the average value  
410 for three embryoid bodies analyzed. **(C)** Number of cardiomyocytes determined in HG8 cells and their  
411 DUSP7 KO. Cell selection started on day 14 and measurements were performed on day 20. Graph  
412 represents mean  $\pm$  SD of four independent replicates. Differences between groups were considered to  
413 be statistically significant when values of  $P < 0.05$  (\*).  
414

415 **Figure 6.** Level of phosphorylation of MAPK is the same in DUSP7 KO cells. **(A)** Levels of  
416 phosphorylation of different MAPKs were measured in unstimulated wild type and DUSP7 KO ES  
417 cells. Quantitative analysis of the ratios between total ERK1/2 and pERK1/2, JNK and pJNK, and p38  
418 and pp38 are shown (right). Graphs represent mean  $\pm$  SD of four independent replicates. **(B)**  
419 Downregulation of DUSP7 by siRNA has no effect on the phosphorylation of ERK1/2. Cells were  
420 transfected by siRNA 24h after passage and lysed after a further 24h of cultivation. Transfection by  
421 scrambled siRNA (scr) was used as control. **(C)** ES cells were cultivated in serum free medium for 6h  
422 (time point 0') and then the phosphorylation of ERK1/2 was stimulated by adding FBS to a total 30%  
423 concentration for 10min, 30min, 1h and 3h before analysis. Quantitative analysis of the ratio between  
424 total ERK1/2 and pERK1/2 is shown (right). Graph represents mean  $\pm$  SD of two independent  
425 replicates.  
426

427 **Figure 7.** Level of DUSP7 changes over time during differentiation. **(A)** Changes in the level of *Dusp7*  
428 expression in vitro culture analyzed by qPCR. Graph represents mean  $\pm$  SD of three independent  
429 replicates. **(B)** Level of *Dusp7* in ES cells and murine heart at different stages of its development  
430 analyzed by qPCR. The level of *Dusp7* has the same pattern in both atrium (A) and ventriculus (V) at  
431 each individual time-point analyzed, but it changes over time, with its lowest expression seen in ES  
432 cells and its highest in adult hearts. Graph represents mean  $\pm$  SD of at least three independent replicates.

433 Differences between groups were considered to be statistically significant when values of  $P < 0.05$  (\*).  
434 (C) Phosphorylation of ERK1/2 in embryoid bodies after 5d of in vitro cultivation.  
435

## 436 **References**

- 437 [1] Chang L, Karin M. Mammalian MAP kinase signalling cascades. *Nature* 2001;410.  
438 <https://doi.org/10.1038/35065000>.
- 439 [2] Rose BA, Force T, Wang Y. Mitogen-Activated Protein Kinase Signaling in the Heart: Angels  
440 Versus Demons in a Heart-Breaking Tale. *Physiological Reviews* 2010;90:1507–46.  
441 <https://doi.org/10.1152/physrev.00054.2009>.
- 442 [3] Yoon S, Seger R. The extracellular signal-regulated kinase: Multiple substrates regulate  
443 diverse cellular functions. *Growth Factors* 2006;24.  
444 <https://doi.org/10.1080/02699050500284218>.
- 445 [4] Huang P, Han J, Hui L. MAPK signaling in inflammation-associated cancer development.  
446 *Protein & Cell* 2010;1. <https://doi.org/10.1007/s13238-010-0019-9>.
- 447 [5] Roskoski R. ERK1/2 MAP kinases: Structure, function, and regulation. *Pharmacological*  
448 *Research* 2012;66:105–43. <https://doi.org/10.1016/j.phrs.2012.04.005>.
- 449 [6] Marshall CJ. MAP kinase kinase kinase, MAP kinase kinase and MAP kinase. *Current*  
450 *Opinion in Genetics & Development* 1994;4:82–9. [https://doi.org/10.1016/0959-](https://doi.org/10.1016/0959-437X(94)90095-7)  
451 [437X\(94\)90095-7](https://doi.org/10.1016/0959-437X(94)90095-7).
- 452 [7] CAMPS M, NICHOLS A, ARKINSTALL S. Dual specificity phosphatases: a gene family for  
453 control of MAP kinase function. *The FASEB Journal* 2000;14:6–16.  
454 <https://doi.org/10.1096/fasebj.14.1.6>.
- 455 [8] Li Z, Fei T, Zhang J, Zhu G, Wang L, Lu D, et al. BMP4 Signaling Acts via Dual-Specificity  
456 Phosphatase 9 to Control ERK Activity in Mouse Embryonic Stem Cells. *Cell Stem Cell*  
457 2012;10:171–82. <https://doi.org/10.1016/j.stem.2011.12.016>.
- 458 [9] Jiapaer Z, Li G, Ye D, Bai M, Li J, Guo X, et al. LincU Preserves Naïve Pluripotency by  
459 Restricting ERK Activity in Embryonic Stem Cells. *Stem Cell Reports* 2018;11:395–409.  
460 <https://doi.org/10.1016/j.stemcr.2018.06.010>.
- 461 [10] Choi J, Clement K, Huebner AJ, Webster J, Rose CM, Brumbaugh J, et al. DUSP9 Modulates  
462 DNA Hypomethylation in Female Mouse Pluripotent Stem Cells. *Cell Stem Cell* 2017;20:706-  
463 719.e7. <https://doi.org/10.1016/j.stem.2017.03.002>.
- 464 [11] Muda M, Boschert U, Dickinson R, Martinou J-C, Martinou I, Camps M, et al. MKP-3, a  
465 Novel Cytosolic Protein-tyrosine Phosphatase That Exemplifies a New Class of Mitogen-  
466 activated Protein Kinase Phosphatase. *Journal of Biological Chemistry* 1996;271:4319–26.  
467 <https://doi.org/10.1074/jbc.271.8.4319>.



- 468 [12] Marques SR, Lee Y, Poss KD, Yelon D. Reiterative roles for FGF signaling in the  
469 establishment of size and proportion of the zebrafish heart. *Developmental Biology*  
470 2008;321:397–406. <https://doi.org/10.1016/j.ydbio.2008.06.033>.
- 471 [13] Lang R, Raffi F. Dual-Specificity Phosphatases in Immunity and Infection: An Update.  
472 *International Journal of Molecular Sciences* 2019;20:2710.  
473 <https://doi.org/10.3390/ijms20112710>.
- 474 [14] Ruvolo PP. Role of protein phosphatases in the cancer microenvironment. *Biochimica et*  
475 *Biophysica Acta (BBA) - Molecular Cell Research* 2019;1866:144–52.  
476 <https://doi.org/10.1016/j.bbamcr.2018.07.006>.
- 477 [15] Camps M, Nichols A, Gillieron C, Antonsson B, Muda M, Chabert C, et al. Catalytic  
478 Activation of the Phosphatase MKP-3 by ERK2 Mitogen-Activated Protein Kinase. *Science*  
479 1998;280:1262–5. <https://doi.org/10.1126/science.280.5367.1262>.
- 480 [16] Levy-Nissenbaum O, Sagi-Assif O, Raanani P, Avigdor A, Ben-Bassat I, Witz PI. cDNA  
481 Microarray Analysis Reveals an Overexpression of the Dual-Specificity MAPK Phosphatase  
482 PYST2 in Acute Leukemia, 2003. [https://doi.org/10.1016/S0076-6879\(03\)66009-X](https://doi.org/10.1016/S0076-6879(03)66009-X).
- 483 [17] Levy-Nissenbaum O, Sagi-Assif O, Raanani P, Avigdor A, Ben-Bassat I, Witz PI.  
484 Overexpression of the dual-specificity MAPK phosphatase PYST2 in acute leukaemia. *Cancer*  
485 *Letters* 2003;199. [https://doi.org/10.1016/S0304-3835\(03\)00352-5](https://doi.org/10.1016/S0304-3835(03)00352-5).
- 486 [18] Levy-Nissenbaum O, Sagi-Assif O, Kapon D, Hantisteanu S, Burg T, Raanani P, et al. Dual-  
487 specificity phosphatase Pyst2-L is constitutively highly expressed in myeloid leukemia and  
488 other malignant cells. *Oncogene* 2003;22. <https://doi.org/10.1038/sj.onc.1206971>.
- 489 [19] Peng W, Huang J, Yang L, Gong A, Mo Y-Y. Linc-RoR promotes MAPK/ERK signaling and  
490 confers estrogen-independent growth of breast cancer. *Molecular Cancer* 2017;16.  
491 <https://doi.org/10.1186/s12943-017-0727-3>.
- 492 [20] Luan T, Zhang X, Wang S, Song Y, Zhou S, Lin J, et al. Long non-coding RNA MIAT  
493 promotes breast cancer progression and functions as ceRNA to regulate DUSP7 expression by  
494 sponging miR-155-5p. *Oncotarget* 2017;8. <https://doi.org/10.18632/oncotarget.19190>.
- 495 [21] Lountos GT, Austin BP, Tropea JE, Waugh DS. Structure of human dual-specificity  
496 phosphatase 7, a potential cancer drug target. *Acta Crystallographica Section F Structural*  
497 *Biology Communications* 2015;71:650–6. <https://doi.org/10.1107/S2053230X1500504X>.
- 498 [22] Radaszkiewicz KA, Beckerová D, Woloszczuková L, Radaszkiewicz TW, Lesáková P,  
499 Blanářová OV, et al. 12-O-Tetradecanoylphorbol-13-acetate increases cardiomyogenesis  
500 through PKC/ERK signaling. *Scientific Reports* 2020;10:15922.  
501 <https://doi.org/10.1038/s41598-020-73074-4>.
- 502 [23] Radaszkiewicz KA, Sýkorová D, Binó L, Kudová J, Bébarová M, Procházková J, et al. The  
503 acceleration of cardiomyogenesis in embryonic stem cells in vitro by serum depletion does not  
504 increase the number of developed cardiomyocytes. *PLOS ONE* 2017;12:e0173140.  
505 <https://doi.org/10.1371/journal.pone.0173140>.



- 506 [24] Andersson-Rolf A, Merenda A, Mustata RC, Li T, Dietmann S, Koo B-K. Simultaneous  
507 paralogue knockout using a CRISPR-concatemer in mouse small intestinal organoids.  
508 *Developmental Biology* 2016;420:271–7. <https://doi.org/10.1016/j.ydbio.2016.10.016>.
- 509 [25] Jinek M, Chylinski K, Fonfara I, Hauer M, Doudna JA, Charpentier E. A Programmable Dual-  
510 RNA-Guided DNA Endonuclease in Adaptive Bacterial Immunity. *Science* 2012;337:816–21.  
511 <https://doi.org/10.1126/science.1225829>.
- 512 [26] Labun K, Montague TG, Krause M, Torres Cleuren YN, Tjeldnes H, Valen E. CHOPCHOP  
513 v3: expanding the CRISPR web toolbox beyond genome editing. *Nucleic Acids Research*  
514 2019;47:W171–4. <https://doi.org/10.1093/nar/gkz365>.
- 515 [27] Ran FA, Hsu PD, Wright J, Agarwala V, Scott DA, Zhang F. Genome engineering using the  
516 CRISPR-Cas9 system. *Nature Protocols* 2013;8:2281–308.  
517 <https://doi.org/10.1038/nprot.2013.143>.
- 518 [28] Malcikova J, Stano-Kozubik K, Tichy B, Kantorova B, Pavlova S, Tom N, et al. Detailed  
519 analysis of therapy-driven clonal evolution of TP53 mutations in chronic lymphocytic  
520 leukemia. *Leukemia* 2015;29:877–85. <https://doi.org/10.1038/leu.2014.297>.
- 521 [29] Navrátilová J, Karasová M, Kohutková Lánová M, Jiráková L, Budková Z, Pacherník J, et al.  
522 Selective elimination of neuroblastoma cells by synergistic effect of Akt kinase inhibitor and  
523 tetrathiomolybdate. *Journal of Cellular and Molecular Medicine* 2017;21:1859–69.  
524 <https://doi.org/10.1111/jcmm.13106>.
- 525 [30] Kučera J, Netušilová J, Sladeček S, Lánová M, Vašíček O, Štefková K, et al. Hypoxia  
526 Downregulates MAPK/ERK but Not STAT3 Signaling in ROS-Dependent and HIF-1-  
527 Independent Manners in Mouse Embryonic Stem Cells. *Oxidative Medicine and Cellular*  
528 *Longevity* 2017;2017:1–16. <https://doi.org/10.1155/2017/4386947>.
- 529 [31] Chu VT, Weber T, Wefers B, Wurst W, Sander S, Rajewsky K, et al. Increasing the efficiency  
530 of homology-directed repair for CRISPR-Cas9-induced precise gene editing in mammalian  
531 cells. *Nature Biotechnology* 2015;33:543–8. <https://doi.org/10.1038/nbt.3198>.
- 532 [32] Pan GJ, Chang ZY, Scholer HR, Pei D. Stem cell pluripotency and transcription factor Oct4.  
533 *Cell Research* 2002;12:321–9. <https://doi.org/10.1038/sj.cr.7290134>.
- 534 [33] Pan G, Thomson JA. Nanog and transcriptional networks in embryonic stem cell pluripotency.  
535 *Cell Research* 2007;17:42–9. <https://doi.org/10.1038/sj.cr.7310125>.
- 536 [34] Takahashi K, Yamanaka S. Induction of Pluripotent Stem Cells from Mouse Embryonic and  
537 Adult Fibroblast Cultures by Defined Factors. *Cell* 2006;126:663–76.  
538 <https://doi.org/10.1016/j.cell.2006.07.024>.
- 539 [35] Martello G, Bertone P, Smith A. Identification of the missing pluripotency mediator  
540 downstream of leukaemia inhibitory factor. *The EMBO Journal* 2013;32:2561–74.  
541 <https://doi.org/10.1038/emboj.2013.177>.

- 542 [36] Rathjen J, Lake JA, Bettess MD, Washington JM, Chapman G, Rathjen PD. Formation of a  
543 primitive ectoderm like cell population, EPL cells, from ES cells in response to biologically  
544 derived factors. *Journal of Cell Science* 1999;112 ( Pt 5):601–12.
- 545 [37] Kitajima S, Takagi A, Inoue T, Saga Y. MesP1 and MesP2 are essential for the development  
546 of cardiac mesoderm. *Development (Cambridge, England)* 2000;127:3215–26.
- 547 [38] Bondue A, Lapouge G, Paulissen C, Semeraro C, Iacovino M, Kyba M, et al. Mesp1 Acts as a  
548 Master Regulator of Multipotent Cardiovascular Progenitor Specification. *Cell Stem Cell*  
549 2008;3:69–84. <https://doi.org/10.1016/j.stem.2008.06.009>.
- 550 [39] Lin Q, Schwarz J, Bucana C, N. Olson E. Control of Mouse Cardiac Morphogenesis and  
551 Myogenesis by Transcription Factor MEF2C. *Science* 1997;276:1404–7.  
552 <https://doi.org/10.1126/science.276.5317.1404>.
- 553 [40] Molkentin JD, Lin Q, Duncan SA, Olson EN. Requirement of the transcription factor GATA4  
554 for heart tube formation and ventral morphogenesis. *Genes & Development* 1997;11:1061–72.  
555 <https://doi.org/10.1101/gad.11.8.1061>.
- 556 [41] Lentjes MH, Niessen HE, Akiyama Y, de Bruïne AP, Melotte V, van Engeland M. The  
557 emerging role of GATA transcription factors in development and disease. *Expert Reviews in*  
558 *Molecular Medicine* 2016;18:e3. <https://doi.org/10.1017/erm.2016.2>.
- 559 [42] Pekkanen-Mattila M, Pelto-Huikko M, Kujala V, Suuronen R, Skottman H, Aalto-Setälä K, et  
560 al. Spatial and temporal expression pattern of germ layer markers during human embryonic  
561 stem cell differentiation in embryoid bodies. *Histochemistry and Cell Biology* 2010;133:595–  
562 606. <https://doi.org/10.1007/s00418-010-0689-7>.
- 563 [43] Slack DN, Seternes O-M, Gabrielsen M, Keyse SM. Distinct Binding Determinants for  
564 ERK2/p38 $\alpha$  and JNK MAP Kinases Mediate Catalytic Activation and Substrate Selectivity of  
565 MAP Kinase Phosphatase-1. *Journal of Biological Chemistry* 2001;276.  
566 <https://doi.org/10.1074/jbc.M010966200>.
- 567 [44] Brondello JM, Pouyssegur J, McKenzie FR. Reduced MAP kinase phosphatase-1 degradation  
568 after p42/p44(MAPK)- dependent phosphorylation. *Science* 1999;286:2514–7.  
569 <https://doi.org/10.1126/science.286.5449.2514>.
- 570 [45] Bandyopadhyay S, Chiang C, Srivastava J, Gersten M, White S, Bell R, et al. A human MAP  
571 kinase interactome. *Nature Methods* 2010;7:801–5. <https://doi.org/10.1038/nmeth.1506>.
- 572 [46] Kamakura S, Moriguchi T, Nishida E. Activation of the Protein Kinase ERK5/BMK1 by  
573 Receptor Tyrosine Kinases. *Journal of Biological Chemistry* 1999;274:26563–71.  
574 <https://doi.org/10.1074/jbc.274.37.26563>.
- 575 [47] Arkell RS, Dickinson RJ, Squires M, Hayat S, Keyse SM, Cook SJ. DUSP6/MKP-3  
576 inactivates ERK1/2 but fails to bind and inactivate ERK5. *Cellular Signalling* 2008;20:836–  
577 43. <https://doi.org/10.1016/j.cellsig.2007.12.014>.

- 578 [48] Bermudez O, Pagès G, Gimond C. The dual-specificity MAP kinase phosphatases: critical  
579 roles in development and cancer. *American Journal of Physiology-Cell Physiology*  
580 2010;299:C189–202. <https://doi.org/10.1152/ajpccell.00347.2009>.
- 581 [49] Caunt CJ, Keyse SM. Dual-specificity MAP kinase phosphatases (MKPs). *The FEBS Journal*  
582 2013;280:489–504. <https://doi.org/10.1111/j.1742-4658.2012.08716.x>.
- 583 [50] Caunt CJ, Armstrong SP, Rivers CA, Norman MR, McArdle CA. Spatiotemporal Regulation  
584 of ERK2 by Dual Specificity Phosphatases. *Journal of Biological Chemistry* 2008;283:26612–  
585 23. <https://doi.org/10.1074/jbc.M801500200>.
- 586 [51] Dowd S, Sneddon AA, Keyse SM. Isolation of the human genes encoding the pyst1 and Pyst2  
587 phosphatases: characterisation of Pyst2 as a cytosolic dual-specificity MAP kinase  
588 phosphatase and its catalytic activation by both MAP and SAP kinases. *Journal of Cell*  
589 *Science* 1998;111 ( Pt 22).
- 590 [52] Levy-Nissenbaum O, Barak E, Burg-Golani T, Sagi-Assif O, Kloog Y, Witz P. I. Does the  
591 dual-specificity MAPK phosphatase Pyst2-L lead a monogamous relationship with the Erk2  
592 protein? *Immunology Letters* 2004;92. <https://doi.org/10.1016/j.imlet.2003.11.024>.
- 593 [53] Tischer T, Schuh M. The Phosphatase Dusp7 Drives Meiotic Resumption and Chromosome  
594 Alignment in Mouse Oocytes. *Cell Reports* 2016;17.  
595 <https://doi.org/10.1016/j.celrep.2016.10.007>.
- 596 [54] Matsuda T. STAT3 activation is sufficient to maintain an undifferentiated state of mouse  
597 embryonic stem cells. *The EMBO Journal* 1999;18:4261–9.  
598 <https://doi.org/10.1093/emboj/18.15.4261>.
- 599 [55] Burdon T, Stracey C, Chambers I, Nichols J, Smith A. Suppression of SHP-2 and ERK  
600 Signalling Promotes Self-Renewal of Mouse Embryonic Stem Cells. *Developmental Biology*  
601 1999;210:30–43. <https://doi.org/10.1006/dbio.1999.9265>.
- 602 [56] Niwa H, Ogawa K, Shimosato D, Adachi K. A parallel circuit of LIF signalling pathways  
603 maintains pluripotency of mouse ES cells. *Nature* 2009;460:118–22.  
604 <https://doi.org/10.1038/nature08113>.
- 605 [57] Chappell J, Sun Y, Singh A, Dalton S. MYC/MAX control ERK signaling and pluripotency by  
606 regulation of dual-specificity phosphatases 2 and 7. *Genes & Development* 2013;27.  
607 <https://doi.org/10.1101/gad.211300.112>.
- 608 [58] Liu Y, Chen L, Diaz AD, Benham A, Xu X, Wijaya CS, et al. Mesp1 Marked Cardiac  
609 Progenitor Cells Repair Infarcted Mouse Hearts. *Scientific Reports* 2016;6:31457.  
610 <https://doi.org/10.1038/srep31457>.
- 611 [59] Kuo CT, Morrisey EE, Anandappa R, Sigrist K, Lu MM, Parmacek MS, et al. GATA4  
612 transcription factor is required for ventral morphogenesis and heart tube formation. *Genes &*  
613 *Development* 1997;11:1048–60. <https://doi.org/10.1101/gad.11.8.1048>.

- 614 [60] Yilbas AE, Hamilton A, Wang Y, Mach H, Lacroix N, Davis DR, et al. Activation of GATA4  
615 gene expression at the early stage of cardiac specification. *Frontiers in Chemistry* 2014;2.  
616 <https://doi.org/10.3389/fchem.2014.00012>.
- 617 [61] Vincentz JW, Barnes RM, Firulli BA, Conway SJ, Firulli AB. Cooperative interaction of  
618 *Nkx2.5* and *Mef2c* transcription factors during heart development. *Developmental Dynamics*  
619 2008;237:3809–19. <https://doi.org/10.1002/dvdy.21803>.
- 620 [62] Edmondson DG, Lyons GE, Martin JF, Olson EN. *Mef2* gene expression marks the cardiac  
621 and skeletal muscle lineages during mouse embryogenesis. *Development (Cambridge,*  
622 *England)* 1994;120:1251–63.
- 623 [63] Lin X, Shah S, Bulleit RF. The expression of MEF2 genes is implicated in CNS neuronal  
624 differentiation. *Molecular Brain Research* 1996;42:307–16. [https://doi.org/10.1016/S0169-](https://doi.org/10.1016/S0169-328X(96)00135-0)  
625 [328X\(96\)00135-0](https://doi.org/10.1016/S0169-328X(96)00135-0).
- 626 [64] Li H, Radford JC, Ragusa MJ, Shea KL, McKercher SR, Zaremba JD, et al. Transcription  
627 factor MEF2C influences neural stem/progenitor cell differentiation and maturation in vivo.  
628 *Proceedings of the National Academy of Sciences* 2008;105:9397–402.  
629 <https://doi.org/10.1073/pnas.0802876105>.
- 630 [65] Štefková K, Hanáčková M, Kučera J, Radaszkiewicz KA, Ambrůžová B, Kubala L, et al.  
631 MAPK p38alpha Kinase Influences Haematopoiesis in Embryonic Stem Cells. *Stem Cells*  
632 *International* 2019;2019:1–16. <https://doi.org/10.1155/2019/5128135>.
- 633 [66] Misra-Press A, Rim CS, Yao H, Roberson MS, Stork PJS. A Novel Mitogen-activated Protein  
634 Kinase Phosphatase. STRUCTURE, EXPRESSION, AND REGULATION. *Journal of*  
635 *Biological Chemistry* 1995;270:14587–96. <https://doi.org/10.1074/jbc.270.24.14587>.
- 636 [67] Pérez-Sen, Queipo, Gil-Redondo, Ortega, Gómez-Villafuertes, Miras-Portugal, et al. Dual-  
637 Specificity Phosphatase Regulation in Neurons and Glial Cells. *International Journal of*  
638 *Molecular Sciences* 2019;20:1999. <https://doi.org/10.3390/ijms20081999>.
- 639 [68] Jeanneteau F, Deinhardt K, Miyoshi G, Bennett AM, Chao M v. The MAP kinase phosphatase  
640 MKP-1 regulates BDNF-induced axon branching. *Nature Neuroscience* 2010;13:1373–9.  
641 <https://doi.org/10.1038/nn.2655>.
- 642 [69] Finelli MJ, Murphy KJ, Chen L, Zou H. Differential Phosphorylation of Smad1 Integrates  
643 BMP and Neurotrophin Pathways through Erk/Dusp in Axon Development. *Cell Reports*  
644 2013;3:1592–606. <https://doi.org/10.1016/j.celrep.2013.04.011>.
- 645 [70] Collins LM, O’Keefe GW, Long-Smith CM, Wyatt SL, Sullivan AM, Toulouse A, et al.  
646 Mitogen-Activated Protein Kinase Phosphatase (MKP)-1 as a Neuroprotective Agent:  
647 Promotion of the Morphological Development of Midbrain Dopaminergic Neurons.  
648 *NeuroMolecular Medicine* 2013;15:435–46. <https://doi.org/10.1007/s12017-013-8230-5>.
- 649 [71] Koga S, Kojima S, Kishimoto T, Kuwabara S, Yamaguchi A. Over-expression of map kinase  
650 phosphatase-1 (MKP-1) suppresses neuronal death through regulating JNK signaling in  
651 hypoxia/re-oxygenation. *Brain Research* 2012;1436:137–46.  
652 <https://doi.org/10.1016/j.brainres.2011.12.004>.

- 653 [72] Chandrasekhar A, Komirishetty P, Areti A, Krishnan A, Zochodne DW. Dual Specificity  
654 Phosphatases Support Axon Plasticity and Viability. *Molecular Neurobiology* 2021;58:391–  
655 407. <https://doi.org/10.1007/s12035-020-02119-6>.
- 656 [73] Sokolov BP, Polesskaya OO, Uhl GR. Mouse brain gene expression changes after acute and  
657 chronic amphetamine. *Journal of Neurochemistry* 2003;84:244–52.  
658 <https://doi.org/10.1046/j.1471-4159.2003.01523.x>.
- 659 [74] Dunwoodie SL. Combinatorial signaling in the heart orchestrates cardiac induction, lineage  
660 specification and chamber formation. *Seminars in Cell & Developmental Biology* 2007;18:54–  
661 66. <https://doi.org/10.1016/j.semcdb.2006.12.003>.
- 662 [75] Jin Y, Calvert TJ, Chen B, Chicoine LG, Joshi M, Bauer JA, et al. Mice deficient in *Mkp-1*  
663 develop more severe pulmonary hypertension and greater lung protein levels of arginase in  
664 response to chronic hypoxia. *American Journal of Physiology-Heart and Circulatory*  
665 *Physiology* 2010;298:H1518–28. <https://doi.org/10.1152/ajpheart.00813.2009>.
- 666 [76] Missinato MA, Saydmohammed M, Zuppo DA, Rao KS, Opie GW, Kühn B, et al. *Dusp6*  
667 attenuates Ras/MAPK signaling to limit zebrafish heart regeneration. *Development* 2018.  
668 <https://doi.org/10.1242/dev.157206>.
- 669 [77] Liu R, van Berlo JH, York AJ, Vagnozzi RJ, Maillet M, Molkenin JD. DUSP8 Regulates  
670 Cardiac Ventricular Remodeling by Altering ERK1/2 Signaling. *Circulation Research*  
671 2016;119:249–60. <https://doi.org/10.1161/CIRCRESAHA.115.308238>.
- 672 [78] Maillet M, Purcell NH, Sargent MA, York AJ, Bueno OF, Molkenin JD. DUSP6 (MKP3)  
673 Null Mice Show Enhanced ERK1/2 Phosphorylation at Baseline and Increased Myocyte  
674 Proliferation in the Heart Affecting Disease Susceptibility. *Journal of Biological Chemistry*  
675 2008;283:31246–55. <https://doi.org/10.1074/jbc.M806085200>.
- 676 [79] Auger-Messier M, Accornero F, Goonasekera SA, Bueno OF, Lorenz JN, van Berlo JH, et al.  
677 Unrestrained p38 MAPK Activation in *Dusp1/4* Double-Null Mice Induces Cardiomyopathy.  
678 *Circulation Research* 2013;112:48–56. <https://doi.org/10.1161/CIRCRESAHA.112.272963>.
- 679 [80] Wu L, Liu Y, Zhao Y, Li M, Guo L. Targeting DUSP7 signaling alleviates hepatic steatosis,  
680 inflammation and oxidative stress in high fat diet (HFD)-fed mice via suppression of TAK1.  
681 *Free Radical Biology and Medicine* 2020;153.  
682 <https://doi.org/10.1016/j.freeradbiomed.2020.04.009>.

683

## 684 **Supplementary Material:**

- 685 **Supplementary figure 1 A:** Whole embryoid body staining of WT cells  
686 **Supplementary figure 1 B:** Whole embryoid body staining of DUSP7 KOa cells  
687 **Supplementary figure 1 C:** Whole embryoid body staining of DUSP7 KOb cells  
688 **Supplementary figure 1 D:** Whole embryoid body staining of DUSP7 KOc cells  
689 **Supplementary figure 2 A:** Whole embryoid body staining of WT cells  
690 **Supplementary figure 2 B:** Whole embryoid body staining of DUSP7 KOa cells  
691 **Supplementary figure 2 C:** Whole embryoid body staining of DUSP7 KOb cells



692 **Supplementary figure 2 D:** Whole embryoid body staining of DUSP7 KOc cells  
693 **Supplementary figure 3 A:** DUSP7 KO cells form fewer cardiomyocytes compared to wild type cells,  
694 as analyzed by immunocytochemistry – WT cells.  
695 **Supplementary figure 3 B:** DUSP7 KO cells form fewer cardiomyocytes compared to wild type cells,  
696 as analyzed by immunocytochemistry – DUSP7 KOa cells  
697 **Supplementary figure 3 C:** DUSP7 KO cells form fewer cardiomyocytes compared to wild type cells,  
698 as analyzed by immunocytochemistry – DUSP7 KOb cells  
699 **Supplementary figure 3 D:** DUSP7 KO cells form fewer cardiomyocytes compared to wild type cells,  
700 as analyzed by immunocytochemistry – DUSP7 KOc cells  
701 **Supplementary figure 4:** Addition of TPA increases the number of cardiomyocytes.  
702 **Supplementary figure 5:** Cardiomyocytes derived from DUSP7 KO cells have the same maturity  
703 profile as cardiomyocytes from wt cells.  
704 **Supplementary figure 6:** Expression of DUSP changes during development.  
705 **Supplementary figure 7:** Difference in the phosphorylation of ERK1/2 by the downregulation of  
706 DUSP6.

## 707 **Declarations**

## 708 **Competing Interests**

709 The authors declare that the research was conducted in the absence of any commercial or financial  
710 relationships that could be construed as a potential conflict of interest.

## 711 **Availability of Data and Materials**

712 All data supporting the findings is present in the presented manuscript. Raw data is available based on  
713 request.

## 714 **Ethics approval and consent to participate**

715 Human data: Not applicable. Animal data: CD1 mice were maintained and bred under standard  
716 conditions and were used in accordance with European Community Guidelines on accepted principles  
717 for the use of experimental animals. Mouse hearts were isolated according to an experimental protocol  
718 that was approved by the National and Institutional Ethics Committee (protocol MSMT-18110/2017-  
719 5).

## 720 **Author Contributions**

721 SS, KAR and JP contributed to conception and design of the study. TG and TWR contributed to  
722 conception and design of the knock-out models. SS, KAR, MB performed experiments. All authors  
723 contributed to manuscript revision, read, and approved the submitted version

## 724 **Funding**

725 This research was supported by the Faculty of Science of Masaryk University (MUNI/A/1145/2017)  
726 and by the Czech Science Foundation (Project 18-18235S); SS was supported by a grant from the  
727 Czech Science Foundation (Project 19-16861S).

728

729 **Acknowledgments**

730 This research was supported by the Faculty of Science of Masaryk University (MUNI/A/1145/2017)  
731 and by the Czech Science Foundation (Project 18-18235S); SS was supported by a grant from the  
732 Czech Science Foundation (Project 19-16861S).

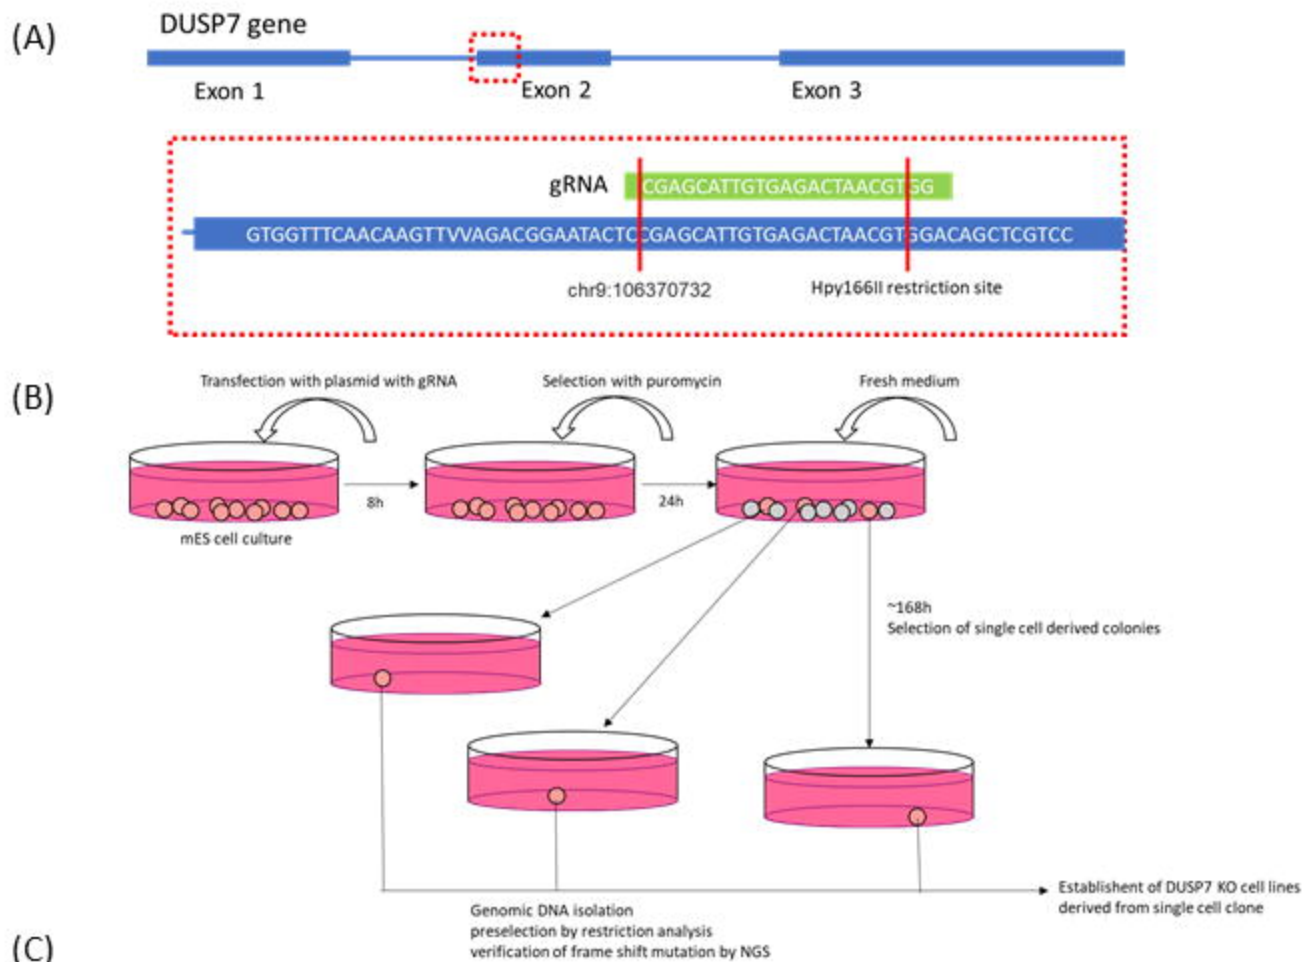

| <i>Dusp7</i> gRNA | CGAGCATTGTGAGACTAACGTGG                 |              |                                         |              |
|-------------------|-----------------------------------------|--------------|-----------------------------------------|--------------|
| WT DUSP7          | TACTCCGAGCATTGTGAGACTAACGTGGACAGCTCGTCT |              |                                         |              |
| Cell line         | Allele 1                                | Modification | Allele 2                                | Modification |
| KO a              | TACTCCGAGCATTGTGA-----GACAGCTCGTCT      | del10        | TACTCCGAGCATTGTGAGACT-ACGTGGACAGCTCGTCT | del1         |
| KO b              | TACTCCGAGCATTGTGA-----GACAGCTCGTCT      | del10        | TACTCCGAGCATTGTGA-----GACAGCTCGTCT      | del10        |
| KO c              | TACTCCGAGCATTGTGAGACTA--GTGGACAGCTCGTCT | del2         | TACTCCGAGCATTGTGAGACTA--GTGGACAGCTCGTCT | del2         |
| HG8 a             | TACTCCGAGCATTGTGAGAC-AACGTGGACAGCTCGTCT | del1         | TACTCCGAGCATTGTGAGACTA-----GACAGCTCGTCT | del4         |
| HG8 b             | TACTCCGAGCATTGTGAGACTAA-----TCGTCT      | del10        | TACTCCGAGCATTGTGAGACTAA-----TCGTCT      | del10        |
| HG8 c             | TACTCCGAGC-----AACGTGGACAGCTCGTCT       | del11        | TACTCCGAGCATTGTGAGAC-----TCCT           | del16        |

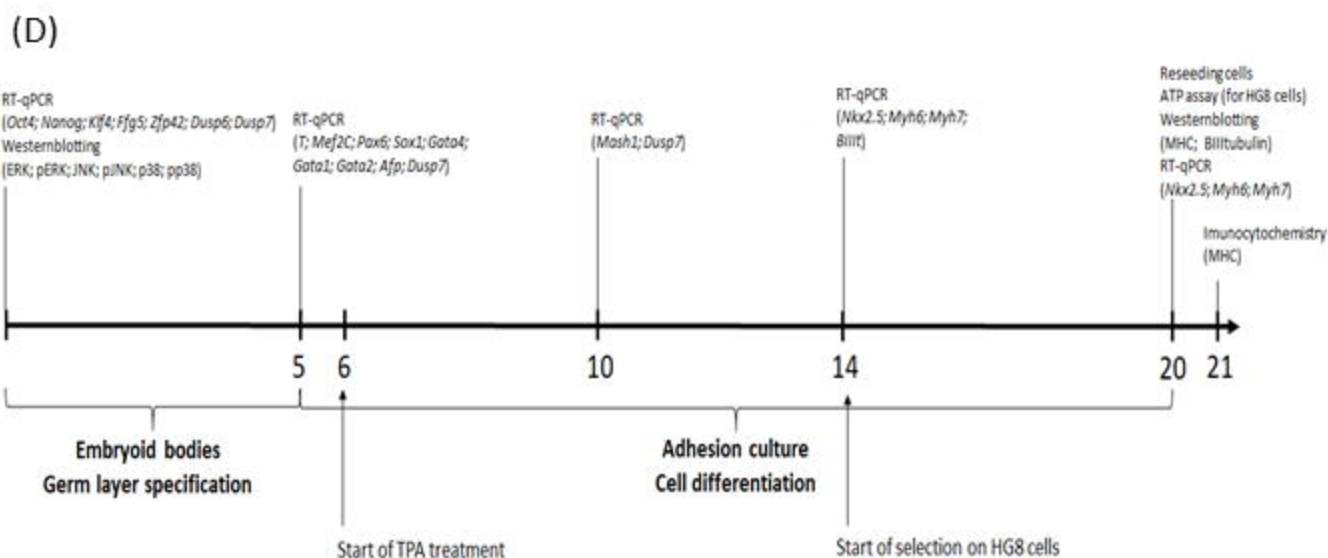

Figure 2.

(which was not certified by peer review) is the author/funder, who has granted bioRxiv a license to display the preprint in perpetuity. It is made available under aCC-BY-ND 4.0 International license.

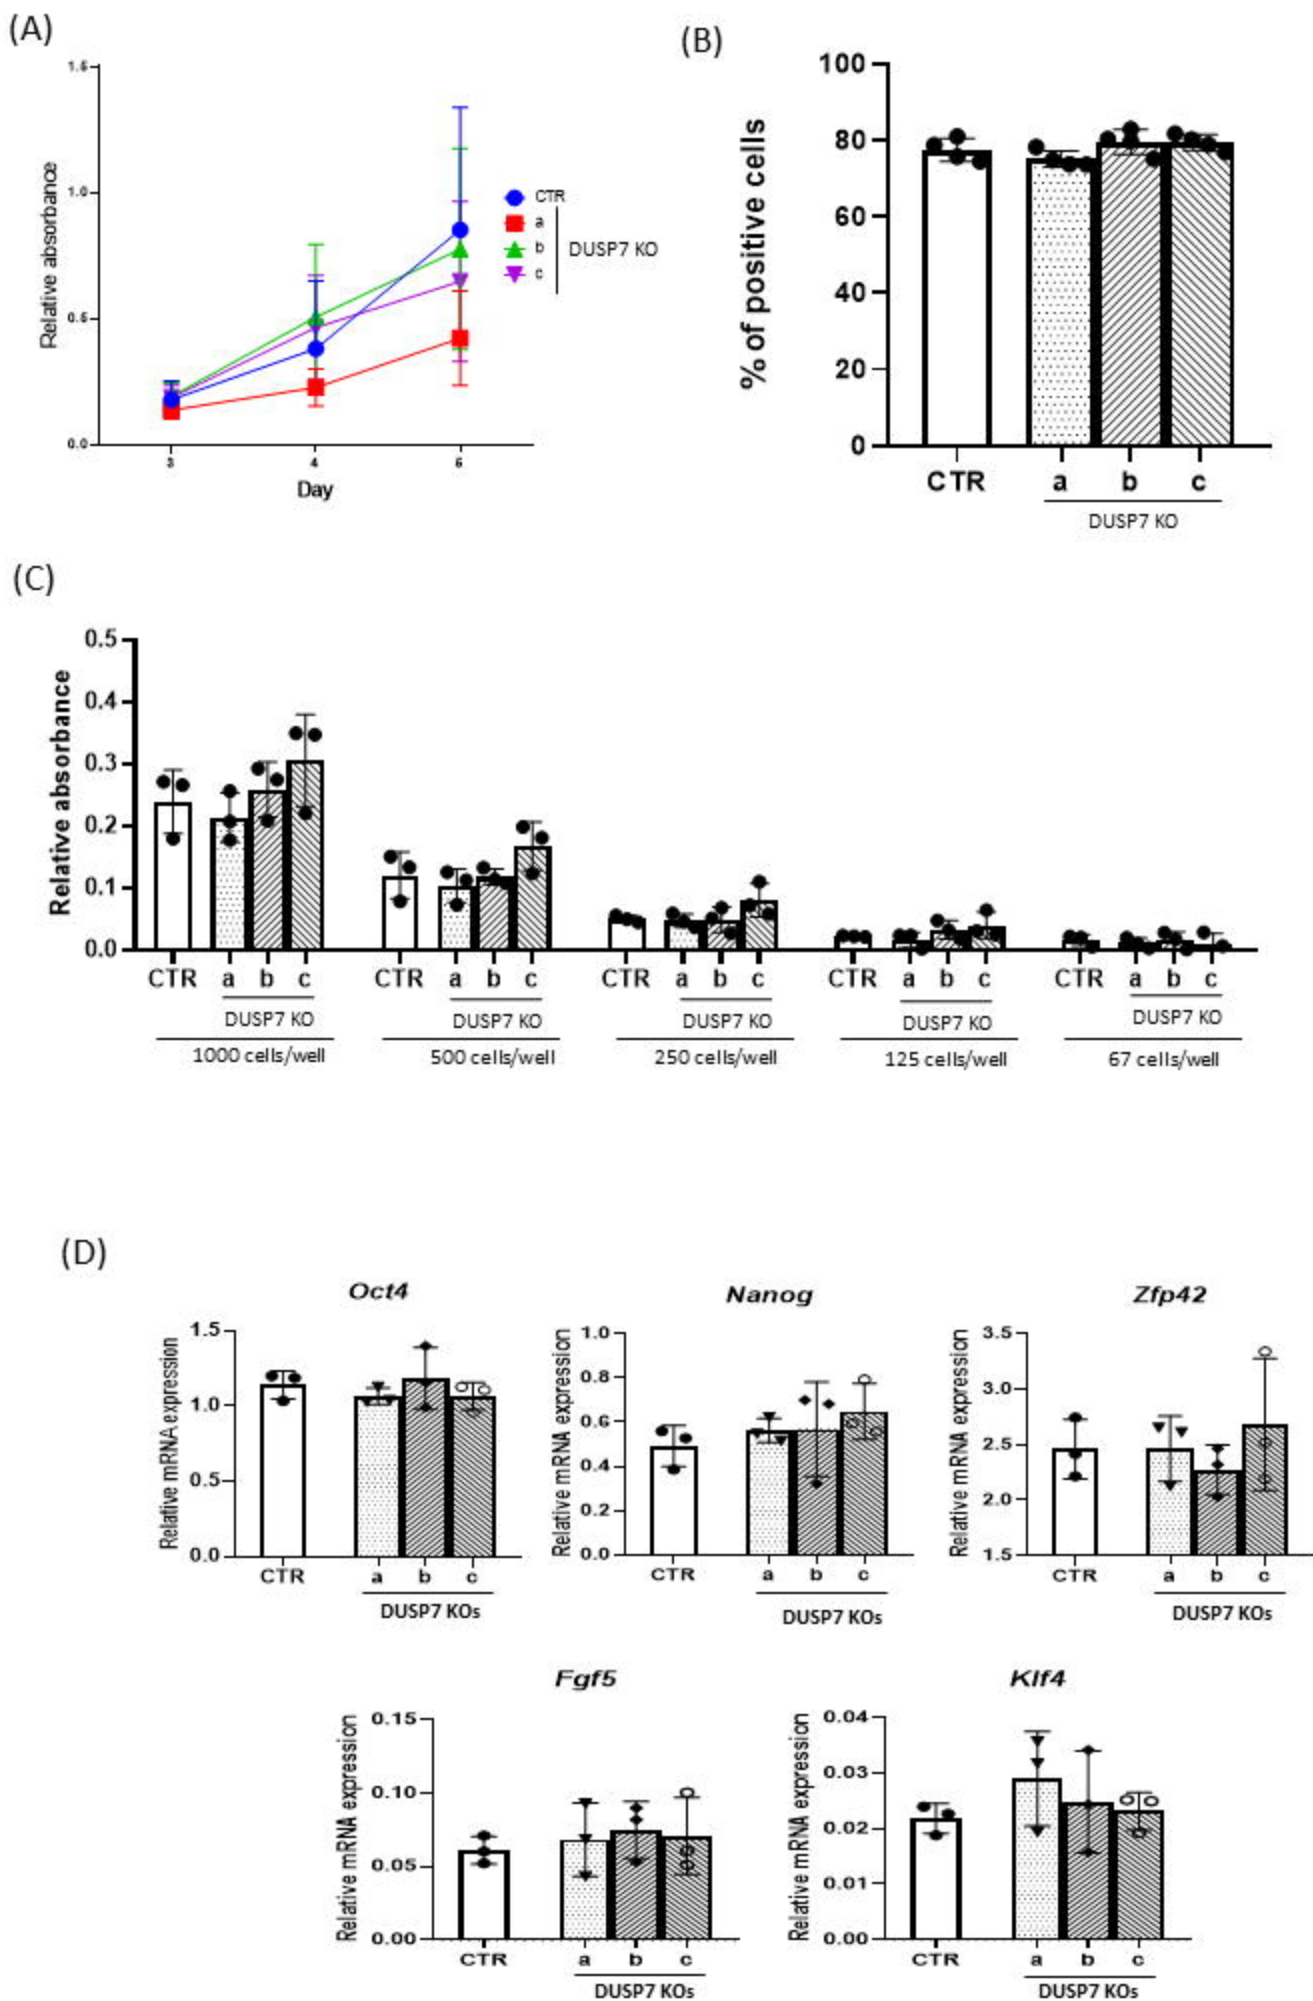

(A)

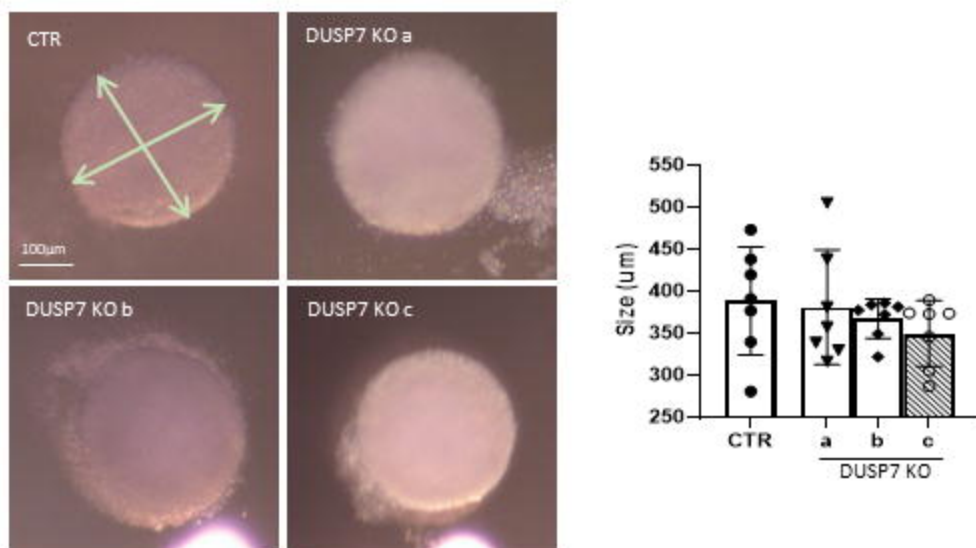

(B)

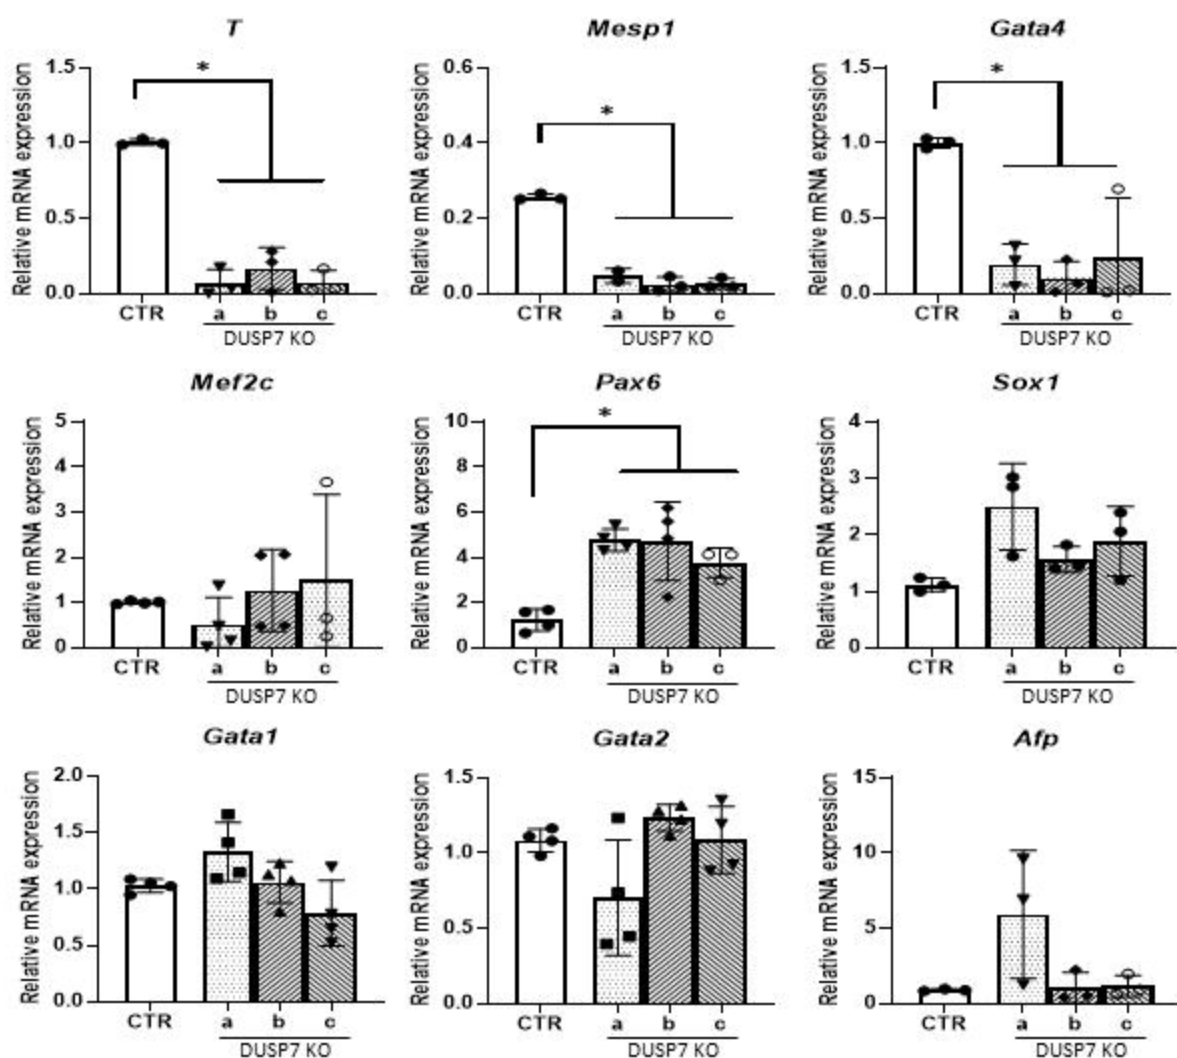



(A)

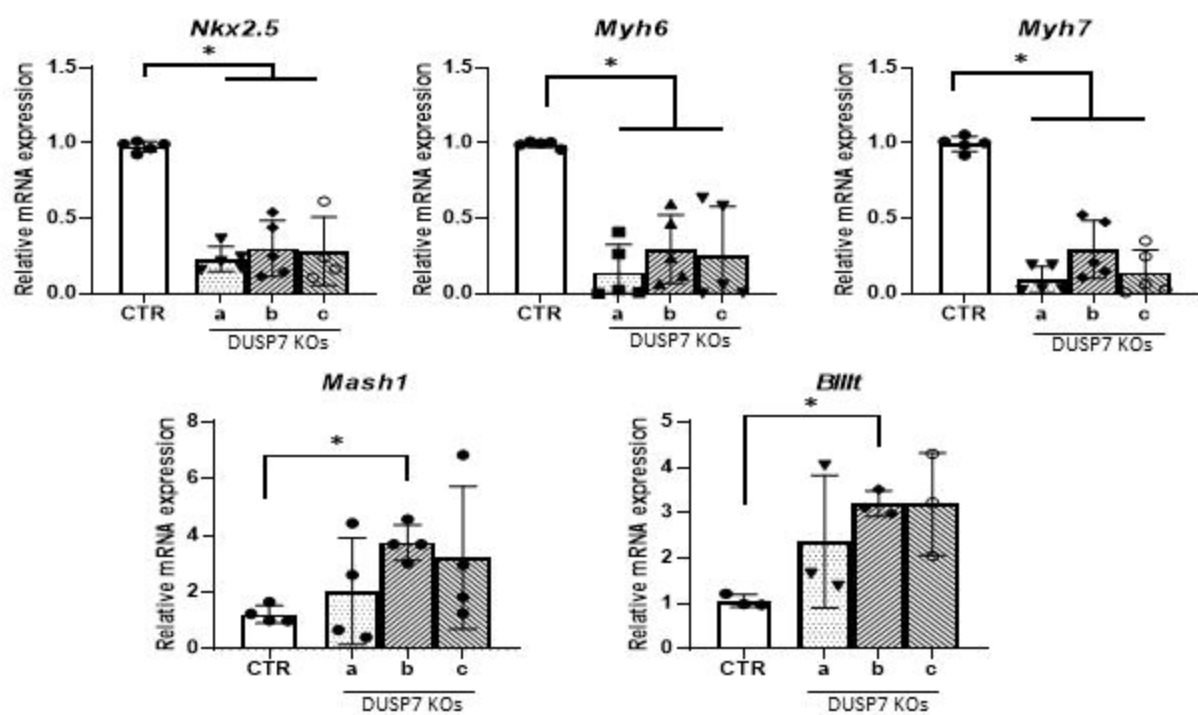

(B)

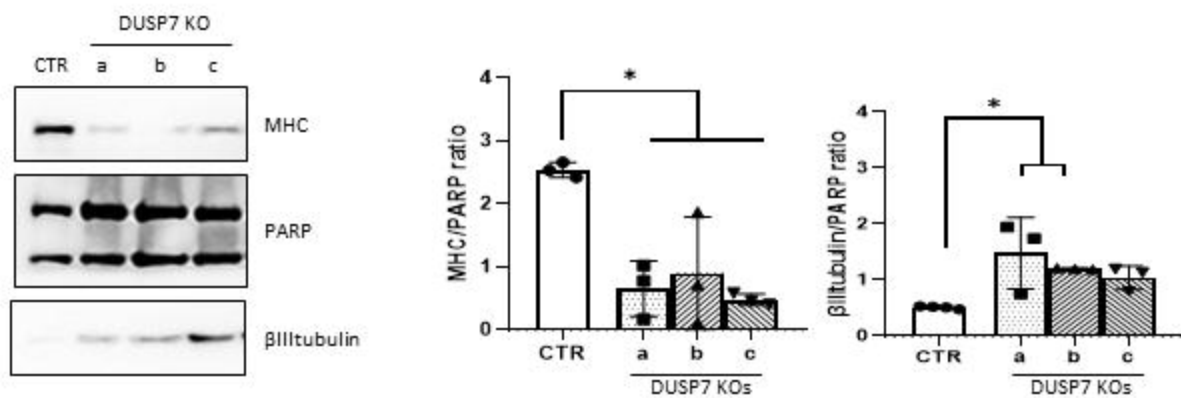

Figure 5.

(which was not certified by peer review) is the author/funder, who has granted bioRxiv a license to display the preprint in perpetuity. It is made available under aCC-BY-ND 4.0 International license.

(A)

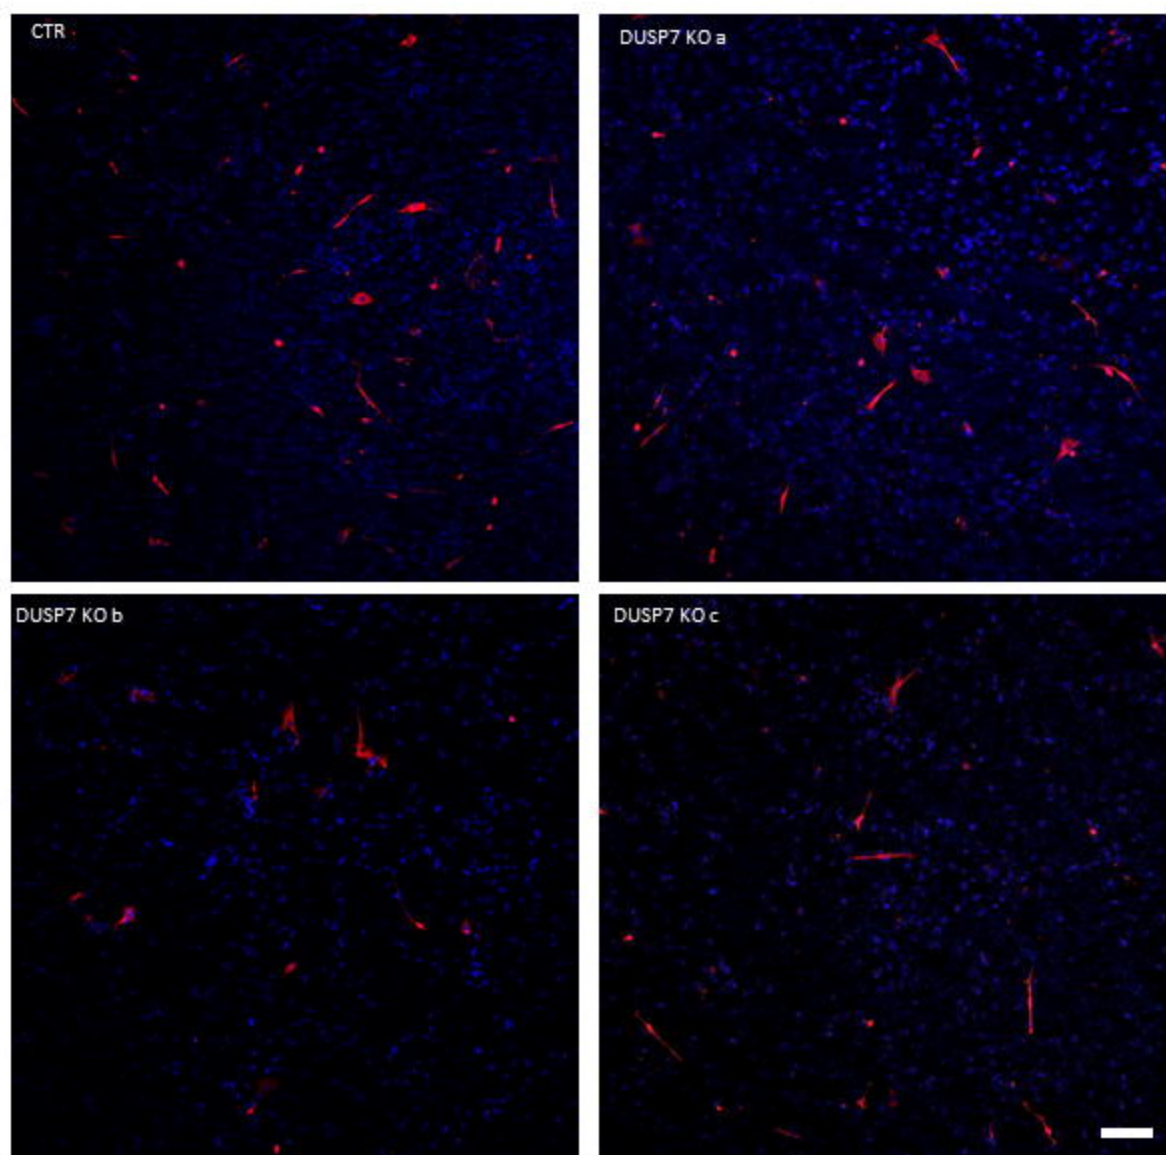

(B)

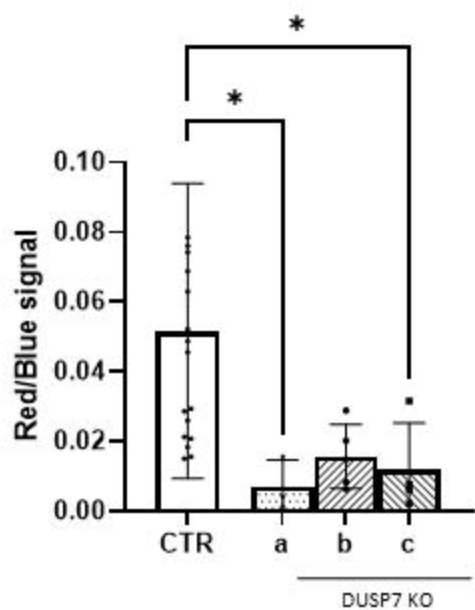

(C)

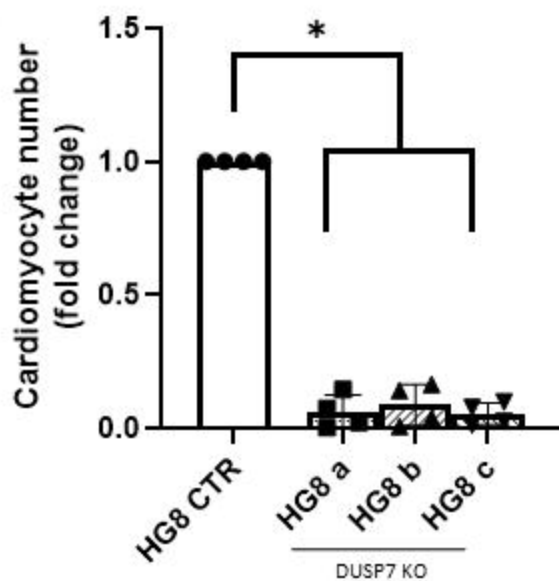

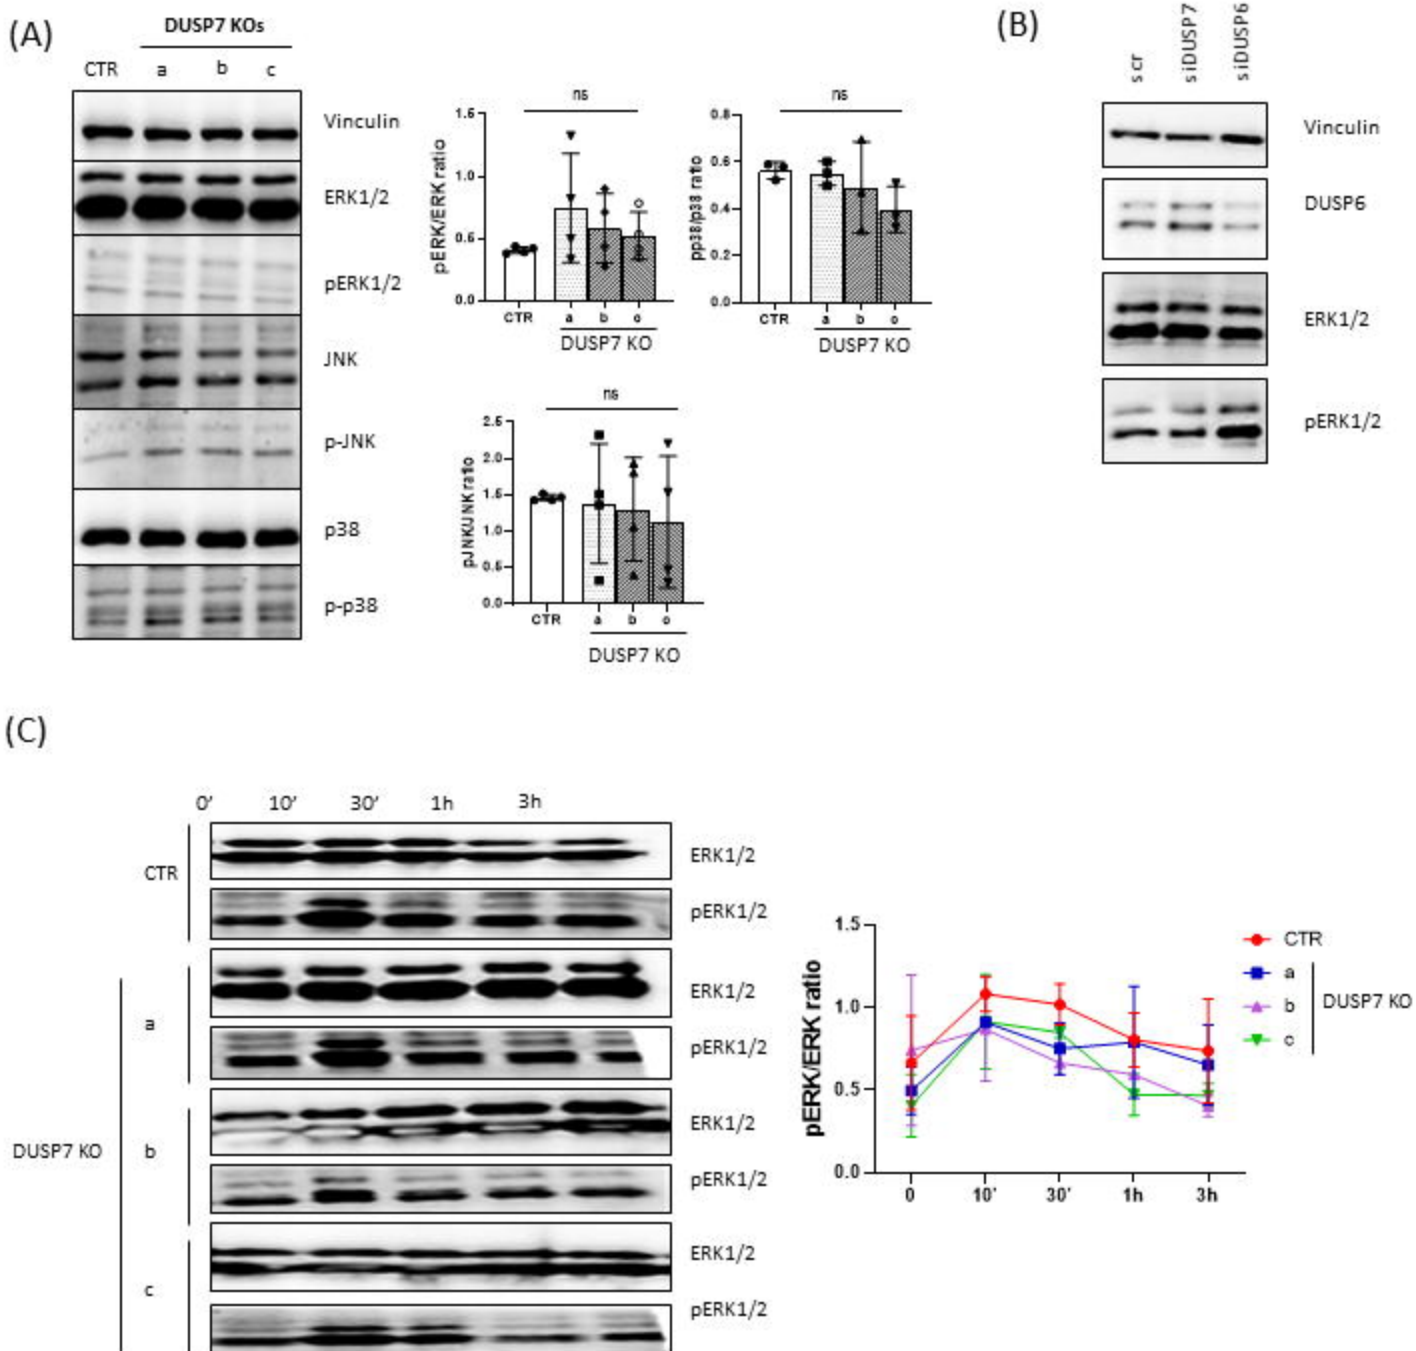

(A)

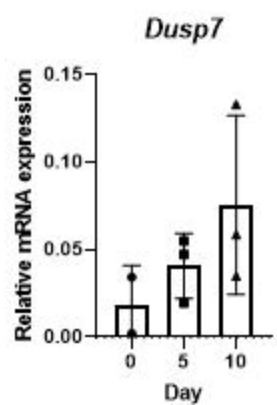

(B)

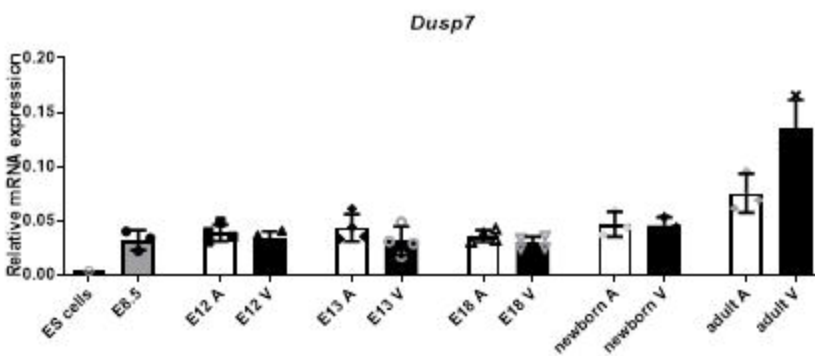

(C)

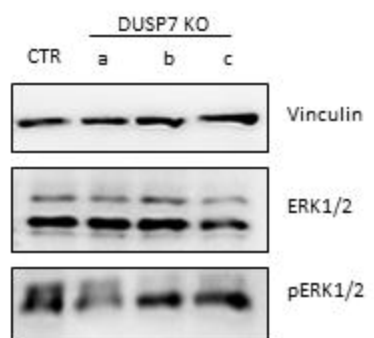

Source: https://www.biorxiv.org/content/10.1101/2022.01.18.476715v2.full.pdf
